1 **Candidate effector proteins from the maize tar spot pathogen *Phyllachora maydis***  
2 **localize to diverse plant cell compartments**

3

4 Matthew Helm<sup>1,†,\*</sup>, Raksha Singh<sup>1,†</sup>, Rachel Hiles<sup>2</sup>, Namrata Jaiswal<sup>1</sup>, Ariana Myers<sup>1,‡</sup>,  
5 Anjali S. Iyer-Pascuzzi<sup>2</sup>, and Stephen B. Goodwin<sup>1</sup>

6

7 <sup>1</sup> Crop Production and Pest Control Research Unit, U.S. Department of Agriculture-  
8 Agricultural Research Service (USDA-ARS), West Lafayette, IN 47907, U.S.A.

9

10 <sup>2</sup> Department of Botany and Plant Pathology, Purdue University, West Lafayette, IN  
11 47907, U.S.A.

12

13 <sup>‡</sup> Present address: Axbio Inc., Santa Clara, CA 95054, U.S.A.

14

15 <sup>†</sup> these authors contributed equally to this work

16

17 \* **Corresponding author:** M. Helm; Email: [Matthew.Helm@usda.gov](mailto:Matthew.Helm@usda.gov)

18

19 **Funding:** This work was supported by the United States Department of Agriculture,  
20 Agriculture Research Service (USDA-ARS) research project 5020-21220-014-00D and  
21 an appointment to the Oak Ridge Institute for Science and Education (ORISE). This  
22 research was also funded by the Foundation for Food and Agriculture Research New  
23 Innovator Award and Indiana Hatch Funds (IND011293) awarded to A.I.P.

24 **ABSTRACT**

25           Most fungal pathogens secrete effector proteins into host cells to modulate their  
26 immune responses, thereby promoting pathogenesis and fungal growth. One such  
27 fungal pathogen is the ascomycete *Phyllachora maydis*, which causes tar spot disease  
28 on leaves of maize (*Zea mays*). Sequencing of the *P. maydis* genome revealed 462  
29 putatively secreted proteins of which 40 contain expected effector-like sequence  
30 characteristics. However, the subcellular compartments targeted by *P. maydis* effector  
31 candidate (PmECs) proteins remain unknown and it will be important to prioritize them  
32 for further functional characterization. To test the hypothesis that PmECs target diverse  
33 subcellular compartments, cellular locations of super Yellow Fluorescent Protein  
34 (sYFP)-tagged *P. maydis* effector candidate proteins were identified using a *Nicotiana*  
35 *benthamiana*-based heterologous expression system. Immunoblot analyses showed  
36 that most of the PmEC-fluorescent protein fusions accumulated protein in *N.*  
37 *benthamiana*, indicating the candidate effectors could be expressed in dicot leaf cells.  
38 Laser-scanning confocal microscopy of *N. benthamiana* epidermal cells revealed most  
39 of the *P. maydis* putative effectors localized to the nucleus and cytosol. One candidate  
40 effector, PmEC01597, localized to multiple subcellular compartments including the  
41 nucleus, nucleolus, and plasma membrane while an additional putative effector,  
42 PmEC03792, preferentially labelled both the nucleus and nucleolus. Intriguingly, one  
43 candidate effector, PmEC04573, consistently localized to the stroma of chloroplasts as  
44 well as stroma-containing tubules (stromules). Collectively, these data suggest effector  
45 candidate proteins from *P. maydis* target diverse cellular organelles and may thus

46 provide valuable insights into their putative functions as well as host processes  
47 potentially manipulated by this fungal pathogen.

48

49 **Keywords:** *Phyllachora maydis*, tar spot, effectors, localization, plasma membrane,  
50 nucleus, nucleolus, chloroplasts

51

52

### 53 **INTRODUCTION**

54 Plant pathogens secrete virulence proteins known as effectors to modulate host  
55 immune responses that often have a functional role in facilitating infection (Jones and  
56 Dangl, 2006; Kamoun, 2007; Wang et al., 2011; Zipfel, 2014). Secreted effectors can be  
57 either retained in the plant extracellular space (apoplastic effectors) or translocated into  
58 host cells (cytoplasmic effectors) and can localize to diverse subcellular compartments  
59 (Lorrain et al., 2018; Whisson et al., 2016). For example, an effector protein from the  
60 oomycete *Phytophthora infestans*, PITG\_04097, localizes to the host nucleus, and such  
61 nuclear localization is required for suppression of host defense responses and pathogen  
62 virulence (Zheng et al., 2014). The *Pseudomonas syringae* effector HopG1, which  
63 targets the mitochondria, suppresses host defense responses and promotes cell death  
64 in Arabidopsis (Rodriguez-Puerto et al., 2022). The *Magnaporthe oryzae* effector, AVR-  
65 Pii, is localized to the host cytosol where it suppresses host production of reactive  
66 oxygen species through its inhibition of the rice NADP-malic enzyme2, thereby  
67 disrupting immunity to this fungal pathogen (Singh et al., 2016). Elucidating how crop  
68 pathogen effectors function in host cells is critical, in part, for understanding

69 pathogenicity and virulence mechanisms of fungal pathogens for which control  
70 strategies are currently limited.

71 *Phyllachora maydis* is a foliar, ascomycete fungal pathogen that causes tar spot  
72 disease on maize (*Zea mays* subsp. *mays*) (Rocco da Silva et al., 2021; Ruhl et al.,  
73 2016; Valle-Torres et al., 2020). Though endemic to Central and South America, *P.*  
74 *maydis* was recently identified in the continental United States in 2015 and has since  
75 spread to most maize production regions, indicating this fungal pathogen is capable of  
76 significant global expansion (Mottaleb et al., 2019; Ruhl et al., 2016; Valle-Torres et al.,  
77 2020). Notably, *P. maydis* has been shown to significantly reduce maize yields  
78 especially under favorable environmental conditions, imposing severe financial  
79 constraints to growers (Mueller et al., 2020; Valle-Torres et al., 2020). Temperate-  
80 derived maize inbreds and commercial hybrids provide only partial resistance to *P.*  
81 *maydis*, and no fully resistant maize cultivar has been identified (Telenko et al., 2019).  
82 For these reasons, *P. maydis* is now considered one of the most economically important  
83 foliar pathogens of maize in the U.S. (Mueller et al., 2020; Rocco da Silva et al., 2021;  
84 Valle-Torres et al., 2020).

85 To gain initial insights into *P. maydis* virulence mechanisms, Telenko and  
86 colleagues provided its first draft genome sequence (Telenko et al., 2020). Analysis of  
87 the *P. maydis* genome revealed 462 proteins comprising the predicted secretome, of  
88 which 59 contain effector-like sequence characteristics as predicted by EffectorP (v2.0)  
89 (Telenko et al., 2020). To date, our understanding of how *P. maydis* utilizes its effector  
90 repertoire to promote virulence as well as the subcellular compartments targeted by  
91 these putative effectors remains limited even though this fungal pathogen represents a

92 serious economic concern for maize growers (Helm et al., 2022; Mueller et al., 2020;  
93 Valle-Torres et al., 2020). The inability to culture or genetically manipulate *P. maydis*  
94 (Rocco da Silva et al., 2021; Valle-Torres et al., 2020) substantially hinders  
95 investigations aimed at characterizing its effector repertoire (Helm et al., 2022). To  
96 circumvent these limitations, the field of effector biology utilizes a surrogate plant  
97 system to express epitope-tagged candidate effectors directly inside leaf cells using  
98 *Agrobacterium*-mediated infiltration (agroinfiltration) (Lorrain et al., 2018). *Nicotiana*  
99 *benthamiana* is a well established and extensively used model plant for heterologous  
100 expression of crop pathogen effectors and has been used to investigate the subcellular  
101 compartments targeted by putative effector proteins produced by filamentous fungal  
102 pathogens (Alfano, 2009; Figueroa et al., 2021; Lorrain et al., 2018; Ma et al., 2012;  
103 Petre et al., 2017; Win et al., 2011; Dinne et al., 2021).

104 In the present study, we refined previous effector predictions performed by  
105 Telenko et al. (2020) using EffectorP (v3.0) as well as additional selection criteria  
106 including i) protein size less than 300 amino acids; ii) presence of a signal peptide (as  
107 predicted by SignalP v6.0); and iii) lack of a transmembrane domain. We discovered  
108 that among the 59 proteins originally identified by Telenko and colleagues (2020), 40  
109 contain effector-like protein characteristics that fulfilled our more selective criteria.  
110 Intriguingly, several of the effector candidates from *P. maydis* encode subcellular  
111 targeting sequences including nuclear localization signals (NLS) and chloroplast and  
112 mitochondrial transit peptides, suggesting they may be targeted to specific subcellular  
113 locations. To test this hypothesis, we investigated the subcellular compartments  
114 targeted by *P. maydis* effector candidate proteins (PmECs) using a *Nicotiana*

115 *benthamiana*-based heterologous expression system. Laser-scanning confocal  
116 microscopy of *N. benthamiana* epidermal cells revealed most of the *P. maydis* putative  
117 effectors localized to the nucleus and cytosol. However, one candidate effector,  
118 PmEC01597, consistently localized to multiple subcellular compartments including the  
119 nucleus, nucleolus, and plasma membrane while an additional putative effector,  
120 PmEC03792, preferentially labelled both the nucleus and nucleolus. Intriguingly, the  
121 candidate effector, PmEC04573, consistently localized to the stroma of chloroplasts as  
122 well as stroma-containing tubules (stromules). These data indicate effector candidate  
123 proteins from *P. maydis* target diverse cellular organelles and thus lay the foundation for  
124 future studies to investigate their putative functions as well as host processes potentially  
125 manipulated by this fungal pathogen.

126

127

## 128 **MATERIALS AND METHODS**

129

### 130 **Plant growth conditions**

131 *Nicotiana benthamiana* seeds were sown in plastic pots containing either ProMix  
132 or Berger Seed and Propagation Mix supplemented with Osmocote slow-release  
133 fertilizer (14-14-14). Plants were maintained in a growth chamber with a 16:8 h  
134 photoperiod (light:dark) at 24°C with light and 20°C in the dark and 60% humidity with  
135 average light intensities at plant height of 120  $\mu\text{mol}/\text{m}^2/\text{s}$ .

136

137

138 ***In silico* selection of candidate effectors from *P. maydis* Indiana isolate PM-01**

139 To select candidate effector proteins, we began with the effector predictions  
140 generated previously by Telenko et al., (2020) from the predicted *P. maydis* secretome.  
141 We extracted all 59 candidate effector protein sequences and used EffectorP (v3.0)  
142 (Sperschneider and Dodds, 2022) (<http://effectorp.csiro.au/>) to further improve the  
143 effector prediction performed by Telenko et al. (2020). We also employed SignalP (v6.0)  
144 (Teufel et al., 2022) (<https://services.healthtech.dtu.dk/service.php?SignalP>) to predict  
145 the presence of signal peptide sequences. LOCALIZER (v1.0) (Sperschneider et al.,  
146 2017) (<http://localizer.csiro.au/>) was used to predict the subcellular localizations of the  
147 putative effectors. TMHMM (v2.0;  
148 <https://services.healthtech.dtu.dk/service.php?TMHMM-2.0>) was used to predict  
149 transmembrane helices within the candidate effector proteins. NoD (Scott et al., 2011)  
150 (<http://www.compbio.dundee.ac.uk/www-nod/>) was used to predict the presence of  
151 predicted Nucleolar targeting signal (NoLS). The refined catalog of candidate effector  
152 proteins as determined by our *in silico* pipeline (Figure 1) is shown in Table 1.

153

154 **Generation of plant expression constructs**

155 All constructs in this study were generated using a modified multisite Gateway  
156 cloning system (Invitrogen). The AtUBQ10-NLS:mCherry, AtFLS2:mCherry, RbcS-  
157 TP:mCherry, AtFIB2:mCherry, 3xHA:sYFP (free sYFP), and 3xHA:mCherry (free  
158 mCherry) constructs have been described previously (Denne et al., 2021; Gu et al.,  
159 2011; Helm et al., 2019; Nelson et al., 2007; Qi et al., 2012; Robin et al., 2018).

160 A commercial gene synthesis service (Azenta Life Sciences, South Plainfield,  
161 New Jersey) was used to synthesize the open reading frames (ORFs) of each *P.*  
162 *maydis* effector candidate (PmEC) (without the signal peptide) with codon optimization  
163 for plant expression. The *attL1* and *attL4* Gateway sequences were added to the 5' and  
164 3' ends, respectively, of each *P. maydis* candidate effector to generate Gateway-  
165 compatible DONR clones. The resulting sequences were inserted into the plasmid  
166 vector pUC57 by the service provider. We designated the resulting constructs  
167 pDONR(L1-L4):PmEC.

168 To generate the PmEC-sYFP protein fusions, the pDONR(L1-L4):PmEC  
169 constructs were mixed with pBSDONR(L4r-L2):sYFP (Qi et al., 2012), and the  
170 Gateway-compatible expression vector pEG100 (Earley et al., 2006), which places the  
171 transgene under control of the 35S promoter. All plasmids were recombined by the  
172 addition of LR Clonase II (Invitrogen) and were incubated overnight at 25°C following  
173 the manufacturer's instructions. The resulting constructs were transformed into  
174 *Agrobacterium tumefaciens* GV3101 (pMP90) by electroporation and subsequently  
175 used for transient expression in *Nicotiana benthamiana*.

176

### 177 **Agrobacterium-mediated transient protein expression in *Nicotiana benthamiana***

178 The CaMV 35S-driven constructs described above were mobilized into  
179 *Agrobacterium tumefaciens* GV3101 (pMP90) and grown on LB medium plates  
180 containing 25 µg of gentamicin sulfate and 50 µg of kanamycin per milliliter for 2 days at  
181 30°C. Cultures were prepared in liquid media (10 ml) supplemented with the appropriate  
182 antibiotics and were shaken overnight at 30°C at 225 rpm on an orbital shaker.



183 Following overnight incubation, the cells were pelleted by either centrifuging at 3,600  
184 rpm for 3 minutes or 3,000 rpm for 8 minutes at room temperature. The bacterial pellet  
185 was then resuspended in either 10 mM MgCl<sub>2</sub> or induction medium (10 mM MES, pH  
186 5.5, 3% sucrose), adjusted to an optical density at 600 nm (OD<sub>600</sub>) of 0.4 (final  
187 concentration for each strain in a mixture), and incubated with either 100 or 200 μM  
188 acetosyringone (Sigma-Aldrich) for 3-4 hours at room temperature with constant  
189 shaking. Bacterial suspensions were mixed in equal ratios (1:1) and infiltrated into the  
190 underside of 3- to 4-week-old *Nicotiana benthamiana* leaves with a needleless syringe.  
191 Leaf samples were collected 24 hours after agroinfiltration for immunoblot analyses or  
192 confocal microscopy.

193

#### 194 **Protein extraction and immunoblot analyses**

195 *N. benthamiana* leaf samples (0.5g) were collected at 24 hrs following  
196 agroinfiltration and flash frozen in liquid nitrogen. Tissue was homogenized with protein  
197 extraction buffer (50 mM Tris-HCl [pH 7.5], 150 mM NaCl, 0.1% Nonidet P-40, 1% 2,2'-  
198 dipyrldyl disulfide [DPDS] and 1% protease inhibitor cocktail) (Sigma Aldrich).  
199 Homogenates were briefly mixed and centrifuged twice at 10,000 x g for 10 min at 4°C  
200 to pellet cell debris. Total protein lysates were combined with 4X Laemmli Sample  
201 Buffer (277.8 mM Tris-HCl [pH 6.8], 4.4% LDS, 44.4% (v/v) glycerol, 0.02%  
202 bromophenol blue, and 10% β-mercaptoethanol), and the mixtures were boiled at 95°C  
203 for 10 min. Protein samples were separated on 4-20% Tris-glycine stain-free  
204 polyacrylamide gels (Bio-Rad) at 175 V for 1 hr in 1X Tris/glycine/SDS running buffer.  
205 Total proteins were transferred to nitrocellulose membranes (GE Water and Process

206 Technologies) at 100 V for one hour. Ponceau staining was used to confirm equal  
207 loading and transfer of total protein samples. Membranes were washed with 1X Tris-  
208 buffered saline (50 mM Tris-HCl, 150 mM NaCl [pH 6.8]) solution containing 0.1%  
209 Tween20 (TBST) and incubated with 5% Difco skim milk for 1 hr at room temperature or  
210 overnight at 4°C with gentle shaking. Proteins were subsequently detected with  
211 horseradish peroxidase (HRP)-conjugated anti-GFP antibody (1:5,000) (Miltenyi Biotec)  
212 for 1 hr at room temperature with gentle shaking. Following antibody incubation,  
213 membranes were washed at least three times for 15 minutes in 1x TBST solution.  
214 Protein bands were imaged using equal parts of Clarity Western ECL substrate  
215 peroxide solution and luminol/enhancer (BioRad) solution (Thermo Scientific), with  
216 incubation at room temperature for 5 minutes. Immunoblots were developed using X-ray  
217 film.

218

### 219 **Confocal microscopy**

220 Live-cell imaging of *N. benthamiana* epidermal cells was performed 24 hours  
221 following agroinfiltration using a Zeiss LSM880 Axio Examiner upright confocal  
222 microscope as described previously (Denne et al., 2021). Briefly, *N. benthamiana* leaf  
223 sections were excised and mounted in sterile water between a slide and a coverslip  
224 (adaxial surface toward the objective) and subsequently imaged using a Plan  
225 Apochromat 20x/0.8 objective, pinhole 1.0 AU. For plasmolysis, leaf sections were  
226 prepared as described above, submerged in 0.8 M mannitol solution for 20 minutes, and  
227 imaged shortly thereafter. The sYFP protein fusions were excited using a 514-nm argon  
228 laser and fluorescence was detected between 517-562 nm. Fluorescence from the

229 mCherry-tagged constructs was excited with a 561-nm helium-neon laser and detected  
230 between 565-669 nm. All confocal micrographs were captured on the Zeiss LSM880  
231 upright confocal microscope and processed using the Zeiss Zen Blue Lite program (Carl  
232 Zeiss Microscopy, USA).

233

234

## 235 **RESULTS**

### 236 ***In silico* selection and generation of super Yellow Fluorescent Protein (sYFP)-** 237 **tagged *P. maydis* effector candidate proteins (PmECs) from Indiana isolate PM-01**

238 To identify promising secreted effector candidates, we leveraged effector  
239 predictions previously generated by Telenko et al. (2020). These authors identified 59  
240 *P. maydis* proteins that contain effector-like characteristics as determined by EffectorP  
241 (v2.0). To further refine the previous analyses by Telenko et al. (2020), we mined  
242 through the 59 *P. maydis* effector candidates (PmECs) and selected proteins that  
243 fulfilled more selective criteria: i) size fewer than 300 amino acids; ii) presence of a  
244 signal peptide (as predicted by SignalP v6.0); and iii) lack of a transmembrane domain  
245 (as predicted by TMHMM v2.0). We next leveraged EffectorP (v3.0) to identify putative  
246 effector proteins from this narrowed set of proteins. Among the 59 potential effectors  
247 originally identified by Telenko et al. (2020), 40 contain effector-like protein  
248 characteristics that fulfilled these more selective criteria (Figure 1A). The selected  
249 effector candidates ranged in size from 55 to 299 amino acids (Table 1). We next  
250 employed LOCALIZER (v1.0) to identify predicted nuclear localization signals (NLS),  
251 chloroplast transit peptides, or mitochondrial targeting sequences. As shown in Table 1,

252 many of the candidates are not predicted to target specific subcellular compartments.  
253 However, several PmECs encode predicted nuclear localization signals including  
254 PmEC01597, PmEC03792, and PmEC05617 (Table 1). Two effector candidates,  
255 PmEC03153 and PmEC04573, contain predicted chloroplast transit peptides, and a  
256 mitochondrial targeting sequence was identified in PmEC03493 (Table 1). Intriguingly,  
257 PmEC00848 encoded both a chloroplast transit peptide and a mitochondrial-targeting  
258 sequence and PmEC03706 encoded both a chloroplast transit peptide and NLS,  
259 suggesting these proteins may localize to multiple subcellular compartments (Table 1).

260 To investigate the subcellular compartments targeted by the *P. maydis* effector  
261 candidates, the predicted open reading frames (ORFs) of each of the 40 putative  
262 effectors, without the predicted signal peptides, were synthesized and fused to the N  
263 terminus of super Yellow Fluorescent Protein (PmEC:sYFP) (Figure 1B). The resulting  
264 constructs were recombined into the plant expression binary vector pEarleyGate100  
265 (pEG100) (Earley et al., 2006), which places the candidate effectors downstream of a  
266 35S promoter. The resulting constructs were inserted into *Agrobacterium tumefaciens*  
267 for subsequent *Nicotiana benthamiana*-based heterologous expression assays (Figure  
268 1C-E).

269

270 **Candidate *P. maydis* effector-fluorescent protein fusions accumulate protein in**  
271 ***planta***

272 Prior to assessing the subcellular localization of the *P. maydis* effector-  
273 fluorescent protein fusions, we tested whether these effectors accumulate protein in  
274 dicot leaf cells. This was accomplished by transiently expressing each of the fusion

275 proteins in *N. benthamiana* using *Agrobacterium*-mediated infiltration (agroinfiltration).  
276 Immunoblot analyses revealed that, of the 40 candidate effectors screened, 37  
277 accumulated at detectable levels when transiently expressed in *N. benthamiana* (Figure  
278 2). Three putative effectors (PmEC01936, PmEC02451 and PmEC06216) consistently  
279 failed to express detectable protein suggesting these fusion proteins do not accumulate  
280 when transiently expressed in *N. benthamiana* leaf cells (Figure 2). Though most of the  
281 fusion proteins accumulated at the expected molecular weight, several putative  
282 effectors accumulated protein at lower molecular weights than predicted, suggesting  
283 post-translational modifications (Figure 2). As most *P. maydis* effector-fluorescent  
284 protein fusions accumulated protein, we conclude that *N. benthamiana* is an appropriate  
285 surrogate plant system and can thus be used to investigate the subcellular localization  
286 patterns of *P. maydis* effector-fluorescent protein fusions. Based on these data, we  
287 discarded the effector candidates with insufficient protein expression (PmEC01936,  
288 PmEC02451 and PmEC06216) and retained the remaining candidate effectors for  
289 further *in planta* analyses.

290

291 **The majority of *P. maydis* effector candidate-fluorescent protein fusions localize**  
292 **to the nucleus and cytosol**

293 Live-cell imaging of epidermal cells using laser-scanning confocal microscopy  
294 revealed that among the 37 sYFP-tagged PmECs that accumulate protein, 29 showed  
295 subcellular distribution patterns in the nucleo-cytosol and were indistinguishable from  
296 the free sYFP control (Supplemental Figure 1; Table 1). Furthermore, fluorescence  
297 signal from five sYFP-tagged derivatives, PmEC03436, PmEC03493, PmEC03706,

298 PmEC04014, and PmEC05617, predominantly accumulated in the cytosol  
299 (Supplemental Figure 2; Table 1). Interestingly, PmEC03436:sYFP signal labeled  
300 punctate bodies on the cell periphery, and PmEC04014:sYFP signal was observed in  
301 irregular, cytosolic aggregates (Supplemental Figure 2). In addition to localizing in the  
302 cytosol, PmEC03493:sYFP accumulated in the nucleus as well as sub-nuclear  
303 structures (Supplemental Figure 2). The remaining effector-fluorescent protein fusions  
304 preferentially localized to specific subcellular compartments within the plant cells.

305

306 **The *P. maydis* effector candidate PmEC01597 localizes to multiple subcellular**  
307 **compartments**

308 PmEC01597 encodes a predicted nuclear localization signal (NLS) at its C  
309 terminus as predicted by LOCALIZER (Sperschneider et al., 2017) (Table 1; Figure 3A)  
310 and a nucleolar targeting signal (NoLS) as predicted by NoD  
311 (<http://www.compbio.dundee.ac.uk/www-nod/>; Scott et al., 2011), suggesting this  
312 effector candidate localizes to both the nucleus and nucleolus. To confirm the specific  
313 localization of PmEC01597 to these subcellular compartments, we co-expressed  
314 PmEC01597:sYFP with mCherry-tagged AtUBQ10-NLS or AtFIB2, Arabidopsis proteins  
315 known to localize to the nucleus and nucleolus, respectively (Nelson et al., 2007; Robin  
316 et al., 2018). As predicted, the PmEC01597:sYFP fluorescence signal consistently co-  
317 localized with both the AtUBQ10-NLS:mCherry and AtFIB2:mCherry fluorescence  
318 signals, demonstrating that PmEC01597:sYFP accumulates in the nucleus and  
319 nucleolus (Figure 3C-D). Furthermore, PmEC01597:sYFP also overlapped fluorescence  
320 signals (Figure 3E) with mCherry-tagged FLS2 (FLS2:mCherry), an Arabidopsis protein

321 known to localize on the plasma membrane (Helm et al., 2019). Plasmolysis of *N.*  
322 *benthamiana* epidermal cells expressing PmEC01597:sYFP and AtFLS2:mCherry  
323 revealed separation of the plasma membrane from the cell wall, further supporting  
324 plasma-membrane localization of PmEC01597:sYFP (Supplemental Figure 3).  
325 Collectively, these data demonstrate that PmEC01597 targets multiple subcellular  
326 compartments when expressed in *N. benthamiana*.

327

328 **The *P. maydis* effector candidate PmEC03792 is imported into the nucleus and**  
329 **nucleolus**

330 Fungal pathogens have been shown to express and translocate effectors that  
331 preferentially accumulate protein within the host nucleus (Kemen et al., 2005; Petre et  
332 al., 2015). We, therefore, investigated whether any of the *P. maydis* effector candidates  
333 specifically targeted the nucleus. Analysis of the PmEC03792 protein sequence  
334 revealed a NLS motif at its N terminus (aa 8-30) as well as a nucleolar-targeting  
335 sequence (aa 4-35), suggesting that it may localize to the nucleus as well as the  
336 nucleolus (Sperschneider et al., 2017; Scott et al., 2011) (Table 1). To test our  
337 hypothesis, we transiently expressed the PmEC03792:sYFP protein fusion and  
338 assessed the subcellular localization pattern in *N. benthamiana* epidermal cells. Live-  
339 cell imaging using laser scanning confocal microscopy showed that PmEC03792  
340 preferentially localized to subcellular compartments resembling the nucleus and  
341 nucleolus, whereas free sYFP predominantly localized to the cytoplasm and the nucleus  
342 (Figure 4). To confirm PmEC03792 is indeed localized to the nucleus and nucleolus, we  
343 transiently co-expressed PmEC03792:sYFP with either mCherry-tagged AtUBQ10-NLS

344 or AtFIB2. Consistent with our hypothesis, live-cell imaging revealed that the  
345 PmEC03792:sYFP fluorescence signal co-localized with both the AtUBQ10-  
346 NLS:mCherry and AtFIB2:mCherry fluorescence signals, demonstrating that  
347 PmEC03792:sYFP accumulates in the nucleus and nucleolus (Figure 4).

348

### 349 **PmEC04573 targets the chloroplasts**

350 Chloroplasts often have an essential role in coordinating an effective plant  
351 immune response against pathogens and, as such, are often targeted by proteinaceous  
352 effectors from filamentous fungal pathogens (Littlejohn et al., 2021). Indeed, several of  
353 the *P. maydis* effector candidates encode predicted chloroplast transit peptide (cTP)  
354 sequences (Table 1), suggesting these effector candidates may target host  
355 chloroplasts. We, therefore, investigated whether any of the *P. maydis* effector-  
356 fluorescent protein fusions localized to these subcellular compartments. Intriguingly,  
357 fluorescence from the PmEC04573:sYFP-fluorescent protein fusion was consistently  
358 detected in organelles resembling chloroplasts as well as the nucleo-cytosol (Figure 5A-  
359 D). To test whether PmEC04573:sYFP is indeed chloroplast-localized, we co-expressed  
360 PmEC04573:sYFP with RbcS-TP:mCherry, a subcellular marker for plastids (Nelson et  
361 al., 2007). Consistent with our hypothesis, PmEC04573:sYFP fluorescence signal  
362 overlapped with RbcS-TP:mCherry on chloroplasts as well as stromules (stroma-  
363 containing tubules), confirming PmEC04573:sYFP does indeed accumulate on  
364 chloroplasts (Figure 5B-C).

365 Interestingly, immunoblot analyses with the PmEC04573:sYFP protein fusion  
366 consistently revealed two distinct protein products; the larger protein product was near



367 the predicted molecular weight while the smaller protein band coincided with free sYFP,  
368 suggesting cleavage of sYFP from PmEC04573 had occurred (Figure 2; Supplemental  
369 Figure 4). To exclude that the chloroplast localization observed with PmEC04573:sYFP  
370 was an artifact caused by free sYFP, we coexpressed sYFP with RbcS-TP:mCherry in  
371 *N. benthamiana* leaf cells. As predicted, sYFP fluorescence signal was not observed on  
372 chloroplasts, even when the sYFP signal was saturated (Supplemental Figure 5). These  
373 protein expression data, coupled with the observation that free sYFP did not localize to  
374 chloroplasts, suggests that the nucleo-cytosol localization observed with  
375 PmEC04573:sYFP (Figure 5D) may be attributed to processed sYFP diffusing  
376 throughout the nucleoplasm and cytoplasm.

377

378

## 379 **DISCUSSION**

380 Recent sequencing of the *Phyllachora maydis* genome revealed that this fungal  
381 pathogen encodes putatively secreted effector candidate proteins (Telenko et al., 2020).  
382 However, our general understanding of host cell compartments targeted by the *P.*  
383 *maydis* effector repertoire is limited (Helm et al., 2022). In this study, we leveraged the  
384 availability of the *P. maydis* genome and refined previous effector predictions to  
385 investigate the subcellular compartments targeted by candidate effector proteins using a  
386 *Nicotiana benthamiana*-based heterologous expression system (Figure 1). We found  
387 that 37 of the 40 putative effectors accumulated detectable protein *in planta* (Figure 2).  
388 Among the 37 *P. maydis* effector-fluorescent protein fusions tested, 29 displayed a  
389 nucleo-cytoplasmic distribution that was indistinguishable from the free sYFP control

390 (Supplemental Figure 1) and five predominantly localized to the cytosol (Supplemental  
391 Figure 2). One effector candidate, PmEC01597, localized to multiple subcellular  
392 compartments including the nucleus, nucleolus, and plasma membrane (Figure 3), while  
393 PmEC03792 was specifically imported into both the nucleus and nucleolus with no  
394 observable cytoplasmic stranding (Figure 4). Another putative effector, PmEC04573,  
395 consistently localized to chloroplasts as well as stromules (Figure 5).

396 Collectively, our data suggest that candidate effector proteins from *P. maydis*  
397 localize to distinct subcellular compartments and may associate with host proteins in  
398 these locations. It should be acknowledged that our approach relied on fusing a large  
399 fluorophore to the C terminus of each candidate effector as well as overexpression in a  
400 heterologous model plant. Furthermore, the selected putative effectors are predicted to  
401 encode signal peptides and are thus likely to be secreted; however, there is no direct  
402 evidence these proteins are translocated into host cells. Nevertheless, the observation  
403 that some PmECs accumulated protein and were targeted to specific subcellular  
404 locations within leaf cells suggests that these proteins are *bona fide* cytoplasmic  
405 effectors. Hence, knowledge of the subcellular localization patterns of the *P. maydis*  
406 effector repertoire will be informative in the identification of the host proteins they target  
407 as well as the cellular pathways they alter. Determining whether any of the *P. maydis*  
408 effector candidates have a functional role in manipulating host immune responses as  
409 well as their potential host targets in maize is a focus for future investigations.

410 One effector candidate, PmEC01597, consistently localized to multiple  
411 subcellular compartments including the nucleus, nucleolus, and plasma membrane  
412 (Figure 3). Though it is unclear of the functional significance of PmEC01597 localization

413 to the nucleolus, effectors from fungi and oomycetes have been shown to target this  
414 subcellular compartment (Lorrain et al., 2018). A candidate effector from the poplar leaf  
415 rust pathogen (*Melampsora larici-populina*), termed Mlp124478, encodes a predicted  
416 nuclear localization peptide sequence, and accumulated in the nucleus and nucleolus of  
417 *N. benthamiana* epidermal cells (Ahmed et al., 2018; Petre et al., 2015). Furthermore,  
418 transgenic Arabidopsis constitutively expressing Mlp124478 displayed altered leaf  
419 morphology as well as repressed defense gene expression (Ahmed et al., 2018).  
420 Intriguingly, Chip-PCR analyses revealed that this candidate effector associates with the  
421 TGA1a-binding DNA sequence, suggesting Mlp124478 binds the TGA1a promoter  
422 region and represses expression of defense genes (Ahmed et al., 2018). Though the  
423 biological significance of PmEC01597 accumulating in the nucleolus remains to be  
424 investigated, we hypothesize this putative effector may interfere with host cell  
425 transcriptional machinery of ribosomal RNA (rRNA) genes or processing of ribosomal  
426 RNA synthesis.

427         In addition to targeting the nucleus and nucleolus, PmEC01597 consistently  
428 localized on the plasma membrane when transiently expressed in *N. benthamiana*  
429 epidermal cells (Figure 3). Proteinaceous effectors from filamentous phytopathogens  
430 have indeed been shown to target the plasma membrane where they often modulate  
431 host immune responses (Fabro, 2022; Lorrain et al., 2018). For example, work by  
432 Gaouar and colleagues (2016) showed that a different putative effector from poplar leaf  
433 rust, Mlp124202, localized on the plasma membrane when transiently expressed in *N.*  
434 *benthamiana* and in stable transgenic Arabidopsis. Consistent with the subcellular  
435 localization, yeast two-hybrid assays revealed that Mlp124202 associated with plasma

436 membrane-localized synaptotagmin A (SYTA; At2g20990), suggesting this poplar leaf  
437 rust effector may have a functional role in modulating vesicle-mediated trafficking.  
438 Furthermore, the *Phytophthora sojae*-secreted effector, Avh240, preferentially  
439 accumulated on the host plasma membrane where it associated with and inhibited  
440 secretion of the soybean aspartic protease, GmAP1, thereby suppressing host immune  
441 responses (Guo et al., 2019). Murphy and colleagues (2018) showed that the  
442 *Phytophthora infestans* effector, Pi17316, interacts directly with VASCULAR  
443 HIGHWAY1-interacting kinase from potato (StVIK). Importantly, transgenic  
444 overexpression of StVIK in potato enhanced *Phytophthora infestans* virulence and  
445 colonization, demonstrating StVIK functions at least in part as a susceptibility factor  
446 (Murphy et al., 2018). We, therefore, predict PmEC01597 associates with host proteins  
447 on the plasma membrane to modulate host immune responses, similar to those of other  
448 plasma membrane-localized effectors from fungal and oomycete pathogens. Hence,  
449 future functional characterization of PmEC01597 should prioritize identifying host  
450 proteins from maize that interact with this putative effector.

451       Numerous filamentous phytopathogens often express and translocate effectors  
452 inside host cells where they specifically localize to host nuclear compartments and  
453 manipulate host immune responses (Caillaud et al., 2012; Schornack et al., 2010; Stam  
454 et al., 2013). Here, we show one putative effector, PmEC03792, was specifically  
455 targeted to the nucleus and nucleolus (Figure 4). Consistent with the subcellular  
456 localization pattern, PmEC03792 encoded a predicted NLS motif as well as a nucleolar-  
457 targeting sequence, suggesting this putative effector may manipulate host nucleolar  
458 functions. Indeed, numerous nuclear-localized fungal and oomycete effectors have

459 been shown to disrupt many cellular processes by reprogramming transcriptional  
460 mechanisms to suppress host immune response. For example, AVR2, an effector from  
461 *Phytophthora infestans*, targets the nucleus and suppresses host immune responses  
462 through its association with a brassinosteroid-responsive bHLH transcription factor  
463 (Boch and Bonas, 2010; Turnbull et al., 2017). Furthermore, the *Colletotrichum*  
464 *graminicola* effector, CgEP1, specifically targets the host nucleus where it binds to  
465 chromatin, indicating that CgEP1 may modulate host transcription (Vargas et al., 2016).  
466 Moreover, the *Ustilago maydis* effector, See1, is localized to the host nucleus and  
467 interacts with the host SGT1 protein to reactivate DNA synthesis and cell division in  
468 infected leaves (Redkar et al., 2015). We, therefore, speculate nuclear-localized  
469 PmEC03792 may have a functional role in manipulating host transcription by targeting  
470 host proteins associated with nuclear compartments. Future functional characterization  
471 of PmEC03792 should prioritize identifying host proteins targeted by this candidate  
472 effector.

473         Our finding that the *P. maydis* putative effector PmEC04573 labels chloroplasts  
474 suggests that this fungal pathogen may target this organelle to modulate chloroplast-  
475 mediated host immune responses (Figure 5). Indeed, filamentous fungal pathogens  
476 have evolved intracellular effectors that localize to chloroplasts wherein they subvert  
477 chloroplast-derived immune responses (Littlejohn et al., 2021). For example,  
478 *Melampsora larici-populina* secretes several putative effectors, termed Chloroplast  
479 Targeting Proteins (CTP1, CTP2, and CTP3), that accumulate in the stroma of  
480 chloroplasts when transiently expressed in *N. benthamiana* (Petre et al., 2015; Petre et  
481 al., 2016). Importantly, CTP1, CTP2, and CTP3 encode predicted chloroplast transit

482 peptides that are cleaved upon their translocation to chloroplasts, and which are  
483 necessary and sufficient for chloroplast localization (Petre et al., 2016). The observation  
484 that PmEC04573 also encodes a predicted chloroplast transit peptide sequence and  
485 localizes to chloroplasts suggests the cTP sequence may be necessary for chloroplast  
486 localization.

487         The wheat stripe rust pathogen *Puccinia striiformis* f. sp. *tritici* (Pst) has also  
488 been shown to express and translocate several effectors into host cells where they  
489 subsequently traffic to chloroplasts (Figueroa et al., 2021; Littlejohn et al., 2021). For  
490 example, Pst\_12806 is a haustorium-specific effector that, when secreted, localizes to  
491 host chloroplasts, and interacts with the photosynthesis-related protein TaISP (Xu et al.,  
492 2019). Importantly, the direct association between Pst\_12806 and TaISP suppresses  
493 chloroplast-derived immune responses and photosynthesis, thereby promoting  
494 pathogen growth (Xu et al., 2019). Furthermore, two additional wheat stripe rust  
495 effectors, Pst\_4 and Pst\_5, were recently shown to interact with TaISP and attenuate  
496 chloroplast-derived immune responses (Wang et al., 2021). However, unlike Pst\_12806,  
497 Pst\_4 and Pst\_5 associate with TaISP in the cytoplasm and such interaction likely  
498 prevents TaISP trafficking to the chloroplast, thereby suppressing chloroplast-derived  
499 production of reactive oxygen species (Wang et al., 2021). We, therefore, predict the  
500 subcellular targeting of chloroplasts by *P. maydis* may be important for facilitating  
501 infection. Future work should focus on identifying host proteins from maize that  
502 associate with PmEC04573, and what effect such interactions have on facilitating *P.*  
503 *maydis* infection.

504 We leveraged the availability of the *P. maydis* genome generated using short-  
505 read sequencing technology to select the candidate effectors investigated in our study  
506 (Telenko et al., 2020). However, given the relatively low BUSCO (benchmarking sets of  
507 universal single-copy orthologs) score and the high percentage of repetitive sequences  
508 within the fungal genome, we speculate the current *P. maydis* genome assembly is  
509 incomplete. Hence, future work should aim to generate an improved *P. maydis* genome  
510 using both short- and long-read sequencing technologies as such an improved genome  
511 will likely identify additional *P. maydis* effector candidates.

512 In summary, we show the majority of putative effectors from *P. maydis*  
513 accumulate protein *in planta*, and several localize to specific plant cell compartments  
514 including the nucleus, nucleolus, plasma membrane, and chloroplasts. Our data provide  
515 valuable insights into the putative functions of the *P. maydis* effector candidates as well  
516 as the host processes potentially manipulated by this fungal pathogen. Lastly, our  
517 findings can be used to generate testable hypotheses for addressing the functional roles  
518 of *P. maydis* effectors during pathogenicity as well as identifying their host targets in  
519 maize.

520

521

## 522 **ACKNOWLEDGEMENTS**

523 The authors thank Darcy Telenko (Purdue University) for providing sequences of  
524 the candidate effectors from *P. maydis* Indiana isolate PM-01, and Roger Innes (Indiana  
525 University) for providing the AtFLS2:mCherry, AtFIB2:mCherry, 3xHA:sYFP (free  
526 sYFP), and 3xHA:mCherry (free mCherry) constructs. The authors would like to thank

527 the Purdue University Imaging Facility for access to the Zeiss LSM880 Axio Examiner  
528 upright confocal microscope. We also thank Morgan Carter and Martin Darino for  
529 insightful discussions and critical reading of the manuscript. The funding bodies had no  
530 role in designing the experiments, collecting the data, or writing the manuscript. All  
531 opinions expressed in this paper are the authors' and do not necessarily reflect the  
532 policies and views of USDA, DOE, or ORAU/ORISE. USDA is an equal opportunity  
533 provider and employer.

534

#### 535 **DATA AVAILABILITY STATEMENT**

536 The data that support the findings of this study are available from the  
537 corresponding author upon request.

538

#### 539 **CONFLICT OF INTEREST**

540 The authors declare that they have no competing interests and that the research  
541 was conducted in the absence of any commercial or financial relationships that could be  
542 construed as a potential conflict of interest

543

#### 544 **AUTHOR CONTRIBUTIONS**

545 M.H. and R.S. conceived and designed the study. M.H., R.S., R.H., N.J., and  
546 A.M., performed the experiments. M.H., R.S., R.H., N.J., A.S.I-P, and S.B.G. analyzed  
547 the data. M.H. and R.S. drafted and wrote the manuscript. All authors edited the  
548 manuscript and approved the final version.

549



550 **LITERATURE CITED**

- 551 Ahmed, M.B., Santos, K.C.G.d., Sanchez, I.B., Petre, B., Lorrain, C., Plourde, M.B.,  
552 Duplessis, S., Desgagne-Penix, I., and Germain, H. 2018. A rust fungal effector  
553 binds plant DNA and modulates transcription. *Sci. Rep.* 8, 14718.  
554
- 555 Alfano, J.R. 2009. Roadmap for future research on plant pathogen effectors. *Mol. Plant*  
556 *Pathol.* 10: 805-813.  
557
- 558 Boch, J., and Bonas U. 2010. Xanthomonas AvrBs3 family-type III effectors: discovery  
559 and function. *Annu. Rev. Phytopathol.* 48: 419-436.  
560
- 561 Caillaud, M. C., Piquerez, S. J. M., Fabro, G., Steinbrenner, J., Ishaque, N., and  
562 Beynon, J., Jones, J.D.G. 2012. Subcellular localization of the Hpa RxLR effector  
563 repertoire identifies a tonoplast-associated protein HaRxL17 that confers  
564 enhanced plant susceptibility. *Plant J.* 69: 252–265.  
565
- 566 Denne, N.L., Hiles, R.R., Kyrasyuk, O., Iyer-Pascuzzi, A.S., and Mitra, R.M. 2021.  
567 *Ralstonia solanacearum* effectors localize to diverse organelles in *Solanum*  
568 hosts. *Phytopathology* 111: 2213-2226.  
569
- 570 Earley, K.W., Haag, J.R., Pontes, O., Opper, K., Juehne, T., Song, K., and Pikaard,  
571 C.S. 2006. Gateway-compatible vectors for plant functional genomics and  
572 proteomics. *Plant J.* 45: 616-629.

573

574 Edgar, R.C. 2004. MUSCLE: multiple sequence alignment with high accuracy and high  
575 throughput. *Nucleic Acids Res.* 32: 1792-1797.

576

577 Fabro, G. 2022. Oomycete intracellular effectors: specialised weapons targeting  
578 strategic plant processes. *New Phytol.* 233: 1074-1082.

579

580 Felsenstein, J. 1985. Confidence limits on phylogenies: an approach using the  
581 bootstrap. *Evolution* 39: 783–791.

582

583 Figueroa, M., Ortiz, D., and Henningsen, E.C. 2021. Tactics of host manipulation by  
584 intracellular effectors from plant pathogenic fungi. *Curr. Opin. Plant Biol.* 62:  
585 102054.

586

587 Gaouar, O., Morency, M.J., Letanneur, C., Seguin, A., and Germain, H. 2016. The  
588 124202 candidate effector of *Melampsora larici-populina* interacts with  
589 membranes in *Nicotiana* and *Arabidopsis*. *Can. J. Plant Pathol.* 38: 197-208.

590

591 Gu, Y., and Innes, R.W. 2011. The KEEP ON GOING protein of *Arabidopsis* recruits the  
592 ENHANCED DISEASE RESISTANCE 1 protein to trans-golgi network/early  
593 endosome vesicles. *Plant Physiol.* 155: 1827-1838.

594

- 595 Guo, B., Wang, H., Yang, B., Jiang, W., Jing, M., Li, H., Xia, Y., Xu, Y., Hu, Q., Wang,  
596 F., Yu, F., Wang, Y., Ye, W., Dong, S., Xing, W., and Wang, Y. 2019.  
597 *Phytophthora sojae* effector PsAvh240 inhibits host aspartic protease secretion  
598 to promote infection. *Mol Plant* 12: 552-564.  
599
- 600 Helm, M., Qi, M., Sarker, S., Yu, H., Whitham, S.A., and Innes, R.W. 2019. Engineering  
601 a decoy substrate in soybean to enable recognition of the *Soybean mosaic virus*  
602 NIa protease. *Mol. Plant Microbe Interact.* 32: 760-769.  
603
- 604 Helm, M., Singh, R., Goodwin, S.B., Caldwell, D., and Iyer-Pascuzzi, A.S. 2022. Tar  
605 Spot of Maize: Current knowledge of genetic interactions and future research  
606 prospects to improve disease resistance. *Authorea*. [Preprint] Available at:  
607 <https://doi.org/10.22541/au.164642664.47870546/v2>  
608
- 609 Jones, J., and Dangl, J. 2006. The plant immune system. *Nature* 444: 323-329.  
610
- 611 Kamoun, S. 2007. Groovy times: filamentous pathogen effectors revealed. *Curr. Opin.*  
612 *Plant Biol.* 10: 358-365.  
613
- 614 Kemen, E., Kemen, A. C., Rafiqi, M., Hempel, U., Mendgen, K., Hahn, M., and Voegele,  
615 R.T. 2005. Identification of a protein from rust fungi transferred from haustoria  
616 into infected plant cells. *Mol. Plant Microbe Interact.* 18: 1130-1139.  
617

- 618 Littlejohn, G.R., Breen, S., Smirnoff, N., and Grant, M. 2021. Chloroplast immunity  
619 illuminated. *New Phytol.* 229: 3088-3107.  
620
- 621 Lorrain, C., Petre, B., and Duplessis, S. 2018. Show me the way: rust effector targets in  
622 heterologous plant systems. *Curr. Opin. Microbiol.* 46: 19-25.  
623
- 624 Ma, L., Lukasik, E., Gawehns, F., and Takken, F.L.W. 2012. The use of agroinfiltration  
625 for transient expression of plant resistance and fungal effector proteins in  
626 *Nicotiana benthamiana* leaves. *Methods Mol. Biol.* 835: 61-74.  
627
- 628 Mottaleb, K.A., Loladze, A., Sonder, K., Kruseman, G., and San Vicente, F. 2019.  
629 Threats of tar spot complex disease of maize in the United States of America and  
630 its global consequences. *Mitig. Adapt. Strateg. Glob. Chang.* 24: 281–300.  
631
- 632 Mueller, D. S., Wise, K. A., Sisson, A. J., Allen, T. W., Bergstrom, G. C., Bissonnette, K.  
633 M., Bradley, C.A., Byamukama, E., Chilvers, M.I., Collins, A.A., Esker, P.D.,  
634 Faske, T.R., Friskop, A.J., Hagan, A.K., Heiniger, R.W., Hollier, C.A., Isakeit, T.,  
635 Jackson-Ziems, T.A., Jardine, D.J., Kelly, H.M., Kleczewski, N.M., Koehler, A.M.,  
636 Koenning S.R., Malvick, D.K., Mehl, H.L., Meyer, R.F., Paul, P.A., Peltier, A.J.,  
637 Price, P.P., Robertson, A.E., Roth, G.W., Sikora, E.J., Smith, D.L., Tande, C.A.,  
638 Telenko, D.E.P., Tenuta, A.U., Thiessen, L.D., and Wiebold, W.J. 2020. Corn  
639 yield loss estimates due to diseases in the United States and Ontario, Canada,  
640 from 2016 to 2019. *Plant Health Prog.* 21: 238-247.

641

642 Murphy, F., He, Q., Armstrong, M., Giuliani, L.M., Boevink, P.C., Zhang, W., Tian, Z.,

643 Birch, P.R.J., Gilroy, E.M. 2018. The potato MAP3K StVIK is required for the

644 *Phytophthora infestans* RXLR effector Pi17316 to promote disease. *Plant*

645 *Physiol.* 177: 398-410.

646

647 Nei, M., and Kumar, S. 2000. Molecular evolution and phylogenetics. *Oxford University*

648 *Press, New York.*

649

650 Nelson, B.K., Cai, X., and Nebenfuhr, A. 2007. A multicolored set of in vivo organelle

651 markers for co-localization studies in Arabidopsis and other plants. *Plant J.* 51:

652 1126-1136.

653

654 Petre, B., Lorrain, C., Saunders, D.G.O., Win, J., Sklenar, J., Duplessis, S., and

655 Kamoun, S. 2016. Rust fungal effectors mimic host transit peptides to translocate

656 into chloroplasts. *Cell Microbiol.* 18: 453-465.

657

658 Petre, B., Saunders, D.G.O., Sklenar, J., Lorrain, C., Win, J., Duplessis, S., and

659 Kamoun, S. 2015. Candidate effector proteins of the rust pathogen *Melampsora*

660 *larici-populina* target diverse plant cell compartments. *Mol. Plant Microbe*

661 *Interact.* 28: 689-700.

662

- 663 Petre, B., Win, J., Menke, F.L.H., and Kamoun, S. 2017. Protein-protein interaction  
664 assays with effector-GFP fusions in *Nicotiana benthamiana*. *Methods Mol. Biol.*  
665 1659: 85-98.
- 666
- 667 Qi, D., DeYoung, B.J., and Innes, R.W. 2012. Structure-function analysis of the coiled-  
668 coil and leucine-rich repeat domains of the *RPS5* disease resistance protein. *Plant*  
669 *Physiol.* 158: 1819-1832.
- 670
- 671 Redkar, A., Hoser, R., Schilling, L., Zechmann, B., Krzymowska, M., Walbot, V., and  
672 Doehlemann, G. 2015. A secreted effector protein of *Ustilago maydis* guides maize  
673 leaf cells to form tumors. *Plant Cell* 27: 1332–1351.
- 674
- 675 Robin, G.P., Kleemann, J., Neumann, U., Cabre, L., Dallery, J., Lapalu, N., and  
676 O’Connell, R.J. 2018. Subcellular localization screening of *Colletotrichum*  
677 *higginsianum* effector candidates identifies fungal proteins targeted to plant  
678 peroxisomes, golgi bodies, and microtubules. *Front Plant Sci.* 9: 562.
- 679
- 680 Rocco da Silva, C., Check, J., MacCready, J. S., Alakonya, A. E., Beiriger, R. L.,  
681 Bissonnette, K. M., Collins, A., Cruz, C.D., Esker, P.D., Goodwin, S.B., Malvick,  
682 D., Mueller, D.S., Paul, P., Raid, R., Robertson, A.E., Roggenkamp, E., Ross,  
683 T.J., Singh, R., Smith, D.L., Tenuta, A.U., Chilvers, M.I., and Telenko, D.E.P.  
684 2021. Recovery plan for tar spot of corn, caused by *Phyllachora maydis*. *Plant*  
685 *Health Prog.* 22: 596-616.

686

687 Rodríguez-Puerto, C., Chakraborty, R., and Singh, R. Rocha-Loyola, P., and Rojas,  
688 C.M. 2022. The *Pseudomonas syringae* type III effector HopG1 triggers necrotic  
689 cell death that is attenuated by AtNHR2B. *Sci. Rep.* 12: 5388.

690

691 Ruhl, G., Romberg, M.K., Bissonnette, S., Plewa, D., Creswell, T., and Wise, K.A. 2016.  
692 First report of tar spot on corn caused by *Phyllachora maydis* in the United  
693 States. *Plant Dis.* 100: 1496.

694

695 Saitou, N., and Nei, M. 1987. The Neighbor-Joining Method—a new method for  
696 reconstructing phylogenetic trees. *Mol. Biol. Evol.* 4: 406-425.

697

698 Scott, M.S., Troshin, P.V., and Barton, G.J. 2011. NoD: a Nucleolar localization  
699 sequence detector for eukaryotic and viral proteins. *BMC Bioinform.* 12: 317.

700

701 Singh, R., Dangol, S., Chen, Y., Choi, J., Cho, Y. S., Lee, J. E., Choi, M., and Jwa, N.  
702 2016. *Magnaporthe oryzae* effector AVR-Pii helps to establish compatibility by  
703 inhibition of the rice NADP-malic enzyme resulting in disruption of oxidative burst  
704 and host innate immunity. *Mol. Cells* 39: 426–438.

705

706 Schornack, S., Van Damme, M., Bozkurt, T. O., Cano, L. M., Smoker, M., Thines, M.,  
707 Gaulin, E., Kamoun, S., and Huitema, E. 2010. Ancient class of translocated  
708 oomycete effectors targets the host nucleus. *PNAS* 107: 17421–17426.

709

710 Sperschneider, J., Catanzariti, A.M., DeBoer, K., Petre, B., Gardiner, D.M., Singh, K.B.,  
711 Dodds, P.N., and Taylor, J.M. 2017. LOCALIZER: subcellular localization  
712 prediction of both plant and effector proteins in the plant cell. *Sci. Rep.* 7: 44598.  
713

714 Sperschneider, J., and Dodds, P.N. 2022. EffectorP 3.0: Prediction of apoplastic and  
715 cytoplasmic effectors in fungi and oomycetes. *Mol. Plant Microbe Interact.* 35:  
716 146-156.  
717

718 Stam, R., Howden, A., Delgado Cerezo, M., Amaro, T., Motion, G., Pham, J., and  
719 Huitema, E. 2013. Characterization of cell death inducing *Phytophthora capsici*  
720 CRN effectors suggests diverse activities in the host nucleus. *Front. Plant Sci.* 4:  
721 387.  
722

723 Tamura, K., Nei, M., and Kumar, S. 2004. Prospects for inferring very large phylogenies  
724 by using the neighbor-joining method. *PNAS* 101: 11030-11035.  
725

726 Telenko, D. E. P., Chilvers, M. I., Kleczewski, N. M., Smith, D. L., Byrne, A. M., Devillez,  
727 P., Diallo, T., Higgins, D., Joos, D., Kohn, K., Lauer, J., Mueller, B., Singh, M.P.,  
728 Widdicombe, W.D., and Williams, L.A. 2019. How tar spot of corn impacted  
729 hybrid yields during the 2018 Midwest epidemic. *Crop Protection Network*. doi:  
730 10.31274/cpn- 20190729-002.  
731



- 732 Telenko, D. E. P., Ross, T. J., Shim, S., Wang, Q., and Singh, R. 2020. Draft genome  
733 sequence resource for *Phyllachora maydis*—an obligate pathogen that causes  
734 tar spot of corn with recent economic impacts in the United States. *Mol. Plant  
735 Microbe Interact.* 33: 884-887.  
736
- 737 Teufel, F., Almagro Armenteros, J.J., Johansen, A.R., Gislason, M.H., Pihl, S.I.,  
738 Tsirigos, K.D., Winther, O., Brunak, S., von Heijne, G., Nielsen, H. 2022. SignalP  
739 6.0 predicts all five types of signal peptides using protein language models. *Nat.  
740 Biotechnol.* doi.org/10.1038/s41587-021-01156-3  
741
- 742 Turnbull, D., Yang, L., Naqvi, S., Breen, S., Welsh, L., Stephens, J., Morris, J., Boevink,  
743 P.C., Hedley, P.E., Zhan, J., Birch, P.R., and Gilroy, E.M. 2017. RXLR effector  
744 AVR2 up-regulates a brassinosteroid-responsive bHLH transcription factor to  
745 suppress immunity. *Plant Physiol.* 174: 356–369.  
746
- 747 Valle-Torres, J., Ross, T. J., Plewa, D., Avellaneda, M. C., Check, J., Chilvers, M. I.,  
748 Cruz, A.P., Dalla Lana, F., Groves, C., Gongora-Cancul, C., Henriquez-Dole, L.,  
749 Jamann, T., Kleczewski, N., Lipps, S., Malvick, D., McCoy, A.G., Mueller, D.S.,  
750 Paul, P.A., Puerto, C., Schloemer, C., Raid, R.N., Roberston, A., Roggenkamp,  
751 E.M., Smith, D.L., Telenko, D.E.P., and Cruz, C.D. 2020. Tar Spot: an  
752 understudied disease threatening corn production in the Americas. *Plant Dis.*  
753 104: 2541-2550.  
754

- 755 Vargas, W. A., Sanz-Martín, J. M., Rech, G. E, Armijos-Jaramillo, V. D., Rivera, L. P.,  
756 Echeverria, M. M., Diaz-Minguez, J.M., Thon, M.R., and Sukno, S.A. 2016. A  
757 fungal effector with host nuclear localization and DNA-binding properties is  
758 required for maize anthracnose development. *Mol. Plant Microbe Interact.* 29: 83-  
759 95.
- 760
- 761 Wang, Q., Han, C., Ferreira, A. O., Yu, X., Ye, W., Tripathy, S., Kale, S., Gu, B., Sheng,  
762 Y., Sui, Y., Wang, X., Zhang, Z., Cheng, B., Dong, S., Shan, W., Zheng, X., Dou,  
763 D., Tyler, B., and Wang, Y. 2011. Transcriptional programming and functional  
764 interactions within the *Phytophthora sojae* RXLR effector repertoire. *Plant Cell*  
765 23: 2064–2086.
- 766
- 767 Wang, X., Zhai, T., Zhang, X., Tang, C., Zhuang, R., Zhao, H., Xu, Q., Cheng, Y.,  
768 Wang, J., Duplessis, S., Kang, Z., and Wang, X. 2021. Two stripe rust effectors  
769 impair wheat resistance by suppressing import of host Fe-S protein into  
770 chloroplasts. *Plant Physiol.* 187: 2530-2543.
- 771
- 772 Whisson, S. C., Boevink, P. C., Wang, S., and Birch, P. R. J. 2016. The cell biology of  
773 late blight disease. *Curr. Opin. Microbiol.* 34: 127-135.
- 774
- 775 Win, J., Kamoun, S., and Jones, A.M.E. 2011. Purification of effector-target protein  
776 complexes via transient expression in *Nicotiana benthamiana*. *Methods Mol. Biol.*  
777 712: 181-194.

778

779 Xu, Q., Tang, C., Wang, X., Sun, S., Zhao, J., Kang, Z., and Wang, X. 2019. An effector  
780 protein of the wheat stripe rust fungus targets chloroplasts and suppresses  
781 chloroplast function. Nat. Commun. 10: 5571.

782

783 Zipfel, C. 2014. Plant pattern-recognition receptors. Trends Immunol. 35: 345-351.

784

785 Zheng, X., McLellan, H., Fraiture, M., Liu, X., Boevink, P. C., Gilroy, E. M., Chen, Y.,  
786 Kandel, K., Sessa, G., Birch, P.R.J., and Brunner, F. 2014. Functionally  
787 redundant RXLR effectors from *Phytophthora infestans* act at different steps to  
788 suppress early flg22-triggered immunity. PLoS Pathog. 10, e1004057.

789

790

791

792

793

794

795

796

797

798

799

800

801 **Table 1. *Phyllachora maydis* effector candidates (PmEC) investigated in this**  
 802 **study.**

| Protein ID <sup>a</sup> | Amino acids <sup>b</sup> | Signal peptide <sup>c</sup> | Protein size (kDa) <sup>d</sup> | LOCALIZER prediction <sup>e</sup>           | <i>in planta</i> localization <sup>f</sup> |
|-------------------------|--------------------------|-----------------------------|---------------------------------|---------------------------------------------|--------------------------------------------|
| PmEC00197               | 262                      | 16-17                       | 27.3                            |                                             | Nucleus and cytosol                        |
| PmEC00457               | 156                      | 20-21                       | 14.9                            |                                             | Nucleus and cytosol                        |
| PmEC00684               | 140                      | 30-31                       | 13.3                            |                                             | Nucleus and cytosol                        |
| PmEC00848               | 177                      | 20-21                       | 17.2                            | Chloroplast (56-78)<br>Mitochondria (67-87) | Nucleus and cytosol                        |
| PmEC01139               | 201                      | 24-25                       | 19.3                            |                                             | Nucleus and cytosol                        |
| PmEC01169               | 55                       | 20-21                       | 3.9                             |                                             | Nucleus and cytosol                        |
| PmEC01289               | 109                      | 20-21                       | 10.2                            |                                             | Nucleus and cytosol                        |
| PmEC01597               | 211                      | 21-22                       | 21.9                            | NLS (144-176)                               | Nucleus, nucleolus, plasma membrane        |
| PmEC01742               | 78                       | 22-23                       | 6.0                             |                                             | Nucleus and cytosol                        |
| PmEC01936               | 221                      | 20-21                       | 21.6                            |                                             | No accumulation                            |
| PmEC01984               | 121                      | 23-24                       | 10.7                            |                                             | Nucleus and cytosol                        |
| PmEC02017               | 130                      | 17-18                       | 12.1                            |                                             | Nucleus and cytosol                        |
| PmEC02274               | 86                       | 18-19                       | 7.1                             |                                             | Nucleus and cytosol                        |
| PmEC02331               | 222                      | 19-20                       | 21.8                            |                                             | Nucleus and cytosol                        |
| PmEC02451               | 150                      | 17-18                       | 14.2                            |                                             | No accumulation                            |
| PmEC02707               | 95                       | 17-18                       | 8.7                             |                                             | Nucleus and cytosol                        |
| PmEC02872               | 122                      | 21-22                       | 10.5                            |                                             | Nucleus and cytosol                        |
| PmEC02890               | 180                      | 23-24                       | 17.3                            |                                             | Nucleus and cytosol                        |
| PmEC02905               | 101                      | 18-19                       | 9.7                             |                                             | Nucleus and cytosol                        |
| PmEC03053               | 299                      | 23-24                       | 30.7                            |                                             | Nucleus and cytosol                        |
| PmEC03153               | 134                      | 28-29                       | 11.7                            | Chloroplast (17-43)                         | Nucleus and cytosol                        |
| PmEC03234               | 142                      | 20-21                       | 13.2                            |                                             | Nucleus and cytosol                        |
| PmEC03436               | 179                      | 18-19                       | 16.6                            |                                             | Cytosol                                    |
| PmEC03476               | 68                       | 16-17                       | 5.4                             |                                             | Nucleus and cytosol                        |
| PmEC03493               | 212                      | 24-25                       | 21.7                            | Mitochondria (52-73)                        | Nucleus, sub-nuclear, cytosol              |
| PmEC03629               | 95                       | 19-20                       | 8.4                             |                                             | Nucleus and cytosol                        |
| PmEC03706               | 219                      | 19-20                       | 21.2                            | Chloroplast (29-56)<br>NLS (131-134)        | Cytosol                                    |
| PmEC03792               | 96                       | 33-34                       | 7.5                             | NLS (8-30)                                  | Nucleus and nucleolus                      |
| PmEC04014               | 191                      | 20-21                       | 18.9                            |                                             | Cytosol and cytosolic aggregates           |
| PmEC04128               | 281                      | 15-16                       | 30.4                            |                                             | Nucleus and cytosol                        |
| PmEC04129               | 165                      | 18-19                       | 16.0                            |                                             | Nucleus and cytosol                        |
| PmEC04322               | 205                      | 16-17                       | 20.5                            |                                             | Nucleus and cytosol                        |
| PmEC04573               | 159                      | 18-19                       | 15.3                            | Chloroplast (60-88)                         | Nucleus, cytosol, chloroplasts             |
| PmEC05555               | 237                      | 18-19                       | 23.6                            |                                             | Nucleus and cytosol                        |
| PmEC05617               | 143                      | 21-22                       | 13.9                            | NLS (113-121)                               | Cytosol                                    |
| PmEC06216               | 141                      | 23-24                       | 13.1                            |                                             | No accumulation                            |
| PmEC06656               | 193                      | 18-19                       | 19.2                            |                                             | Nucleus and cytosol                        |
| PmEC06699               | 138                      | 19-20                       | 13.0                            |                                             | Nucleus and cytosol                        |
| PmEC06759               | 207                      | 23-24                       | 21.3                            |                                             | Nucleus and cytosol                        |
| PmEC07010               | 197                      | 21-22                       | 19.1                            |                                             | Nucleus and cytosol                        |

a. Data mined from Telenko et al., (2020).

b. Numbers indicate the length of amino acids including the predicted signal peptide.

c. Predicted signal peptide. Numbers indicate amino acid positions. Signal peptide predictions were performed using SignalP (v6.0).

d. Predicted molecular weight (in kilodaltons; kDa) of the mature protein without the signal peptide.

e. Subcellular localization as predicted by LOCALIZER (v1.0). Numbers within the parentheses indicate the amino acid positions within the predicted transit peptide sequence. NLS; nuclear localization signal.

f. Subcellular localization patterns in *Nicotiana benthamiana* epidermal cells determined in this study.

803  
804  
805  
806  
807  
808  
809

810

811

812

813

814

815

816 **FIGURE LEGENDS**

817

818 **Figure 1. Schematic overview of the selection and subsequent analyses of**

819 ***Phyllachora maydis* candidate effectors. A)** The *P. maydis* effector candidates

820 investigated in this study were selected using the aforementioned selection criteria. **B)**

821 The predicted open reading frames (ORFs) of each of the 40 candidate effectors,

822 without their predicted signal peptides, were synthesized and fused to the N terminus of

823 super Yellow Fluorescent Protein (sYFP) and recombined into the plant expression

824 binary vector pEarleyGate100 (pEG100) using a multisite Gateway cloning strategy. **C)**

825 The resulting *P. maydis* effector-fluorescent protein fusion (PmEC:sYFP) constructs

826 were inserted into *Agrobacterium tumefaciens* for subsequent *Nicotiana benthamiana*-

827 based heterologous expression assays. **D)** Immunoblot analyses were used to assess

828 expression of the PmEC-fluorescent protein fusions. **E)** Laser-scanning confocal

829 microscopy was used to assess the live-cell subcellular localization patterns in *N.*

830 *benthamiana* epidermal cells. Figure created with [www.BioRender.com](http://www.BioRender.com).

831

832 **Figure 2. Immunoblot analyses of the *Phyllachora maydis* candidate effector-**

833 **fluorescent fusion proteins.** For panels A-G), the indicated constructs were transiently

834 expressed in 3-week-old *Nicotiana benthamiana* using agroinfiltration. Total protein was

835 extracted 24 hours post-agroinfiltration and immunoblotted with horseradish peroxidase

836 (HRP)-conjugated anti-GFP antibodies. Free sYFP (3xHA:sYFP) and empty vector

837 (e.v.) were included as controls. Ponceau staining of the RuBisCO large subunit was

838 used as a loading control. For each protein, the theoretical protein size is indicated in

839 parentheses (in kilodaltons; kDa). Three independent experiments were performed with  
840 similar results. The results of only one experiment are shown.

841

842 **Figure 3. The PmEC01597-fluorescent protein fusions accumulate within the**  
843 **nucleus, nucleolus, and on the plasma membrane in *N. benthamiana*. A)**

844 Schematic representation of the *P. maydis* PmEC01597 candidate effector including the  
845 nuclear localization signal (NLS). Numbers beneath the schematic illustration represent

846 amino acid positions. **B)** Live-cell imaging of PmEC01597:sYFP in *N. benthamiana*

847 epidermal cells. Free sYFP (left panel) was included as a reference for nucleo-

848 cytoplasmic distribution. The scale bar shown represents 20  $\mu$ M. **C)** Live-cell imaging of

849 PmEC01597:sYFP and AtUBQ10-NLS:mCherry in *N. benthamiana* leaf pavement cells.

850 The scale bars shown represent 10  $\mu$ M. **D)** PmEC01597:sYFP fusion proteins localize

851 to the nucleolus in *N. benthamiana*. mCherry-tagged Arabidopsis FIB2 was included as

852 a reference for nucleolus localization. The scale bars shown represent 10  $\mu$ M. **E)**

853 PmEC01597:sYFP fusion proteins localize on the plasma membrane in *N.*

854 *benthamiana*. mCherry-tagged Arabidopsis FLS2 was included as a reference for

855 plasma membrane localization. For panels B-E), all confocal micrographs shown are of

856 single optical sections and white arrowheads indicate overlapping sYFP and mCherry

857 fluorescence signals.

858

859 **Figure 4. The PmEC03792-fluorescent protein fusion preferentially localizes to the**

860 **nucleolus and nucleus in *N. benthamiana*.** Live-cell imaging of *N. benthamiana* leaf

861 pavement cells expressing **A)** PmEC03792:sYFP and AtFIB2:mCherry, and **(B)**

862 PmEC03792:sYFP and AtUBQ10-NLS:mCherry. White arrowheads indicate  
863 overlapping of sYFP and mCherry fluorescence signals. Images are single optical  
864 sections. For panels A and B), protein fusions were expressed in *N. benthamiana* using  
865 agroinfiltration and live-cell imaging was performed 24 hours following agroinfiltration.

866

867 **Figure 5. PmEC04573-fluorescent protein fusions accumulate on chloroplasts. A)**

868 Live-cell imaging of *P. maydis* PmEC04573:sYFP in *N. benthamiana* epidermal cells.

869 Confocal micrographs are single optical sections. Free sYFP (left panel) was included

870 as a reference for nucleo-cytoplasmic distribution. The scale bar shown represents 50

871  $\mu\text{M}$ . **B-C)** Live-cell imaging of PmEC04573:sYFP and RbcS-TP:mCherry (plastid

872 marker) in *N. benthamiana* leaf pavement cells. The scale bars shown represent 20  $\mu\text{M}$

873 in panel b and 10  $\mu\text{M}$  in panel c. **D)** Live-cell imaging of PmEC04573:sYFP and free

874 mCherry in *N. benthamiana* leaf pavement cells. The scale bars shown represent 20

875  $\mu\text{M}$ . For panels A-D), protein fusions were expressed in *N. benthamiana* using

876 agroinfiltration and live-cell imaging was performed 24 hours following agroinfiltration.

877 All confocal micrographs shown are of single optical sections and white arrowheads

878 indicate overlapping sYFP and mCherry fluorescence signals. Black arrowheads

879 indicate stromules.

880

881 **SUPPLEMENTARY FIGURE LEGENDS**

882

883 **Supplemental Figure 1. sYFP-tagged *P. maydis* effector candidate proteins**

884 **localize to the nucleus and cytosol in *N. benthamiana*.** The indicated constructs

885 were transiently expressed in *N. benthamiana* and imaged using laser-scanning  
886 confocal microscopy 24 hours following agroinfiltration. Confocal micrographs shown  
887 are single optical sections. Free sYFP was included as a reference for nucleo-  
888 cytoplasmic distribution.

889

890 **Supplemental Figure 2. PmEC03436, PmEC03493, PmEC03706, PmEC04014, and**  
891 **PmEC05617 fluorescent protein fusions predominantly accumulate in the**  
892 **cytoplasm in *N. benthamiana*.** Live-cell imaging of PmEC05617:sYFP and  
893 PmEC03706:sYFP in *N. benthamiana* epidermal cells. The indicated constructs were  
894 transiently expressed in *N. benthamiana* and imaged using laser-scanning confocal  
895 microscopy 24 hours following agroinfiltration. Confocal micrographs shown are single  
896 optical sections.

897

898 **Supplemental Figure 3. Plasmolysis of *N. benthamiana* epidermal cells**  
899 **expressing PmEC01597:sYFP and AtFLS2:mCherry fluorescent protein fusions**  
900 **reveal plasma membrane localization. A)** PmEC01597:sYFP fusion proteins localize  
901 on the plasma membrane as indicated by co-localization with AtFLS2:mCherry. Images  
902 are of single optical sections. White arrowheads indicate overlapping sYFP and  
903 mCherry fluorescence signals. The scale bars shown represent 20  $\mu$ M. **B)** Twenty-four  
904 hours following agroinfiltration, leaf sections of *N. benthamiana* expressing  
905 PmEC01597:sYFP and AtFLS2:mCherry were submerged in 0.8 M mannitol for 20  
906 minutes to induce plasmolysis and live-cell imaging was performed shortly thereafter.



907 White arrowheads indicate plasma membrane separation from the adjacent cell. The  
908 scale bar represents 20  $\mu$ M.

909

910 **Supplemental Figure 4. Immunoblot analyses of the PmEC04573:sYFP fusion**

911 **proteins.** The indicated constructs were transiently expressed in 3-week-old *N.*

912 *benthamiana* using agroinfiltration. Total protein was extracted at 24 and 48 hours post-

913 agroinfiltration and immunoblotted with HRP-conjugated anti-GFP antibodies. Free

914 sYFP (3xHA:sYFP) and empty vector (e.v.) were included as controls. The theoretical

915 protein size (in kDa) of each construct is indicated in parentheses. Ponceau S solution

916 staining of RuBisCO was used as a loading control. Three independent experiments

917 were performed with similar results. The results of only one experiment are shown.

918

919 **Supplemental Figure 5. Fluorescence signal from free sYFP is not detected in the**

920 **stroma of chloroplasts when transiently expressed *N. benthamiana* epidermal**

921 **cells.** Twenty-four hours following agroinfiltration, leaf sections of *N. benthamiana*

922 expressing free sYFP and RbcS-TP:mCherry (plastid marker) were excised and imaged

923 using laser-scanning confocal microscopy. Saturation of the sYFP fluorescent signals

924 revealed no observable protein accumulation in the stroma of chloroplasts. Confocal

925 micrographs shown are single optical sections. The scale bar represents 20  $\mu$ M.

926

927

928

929

930 **Figure 1.**

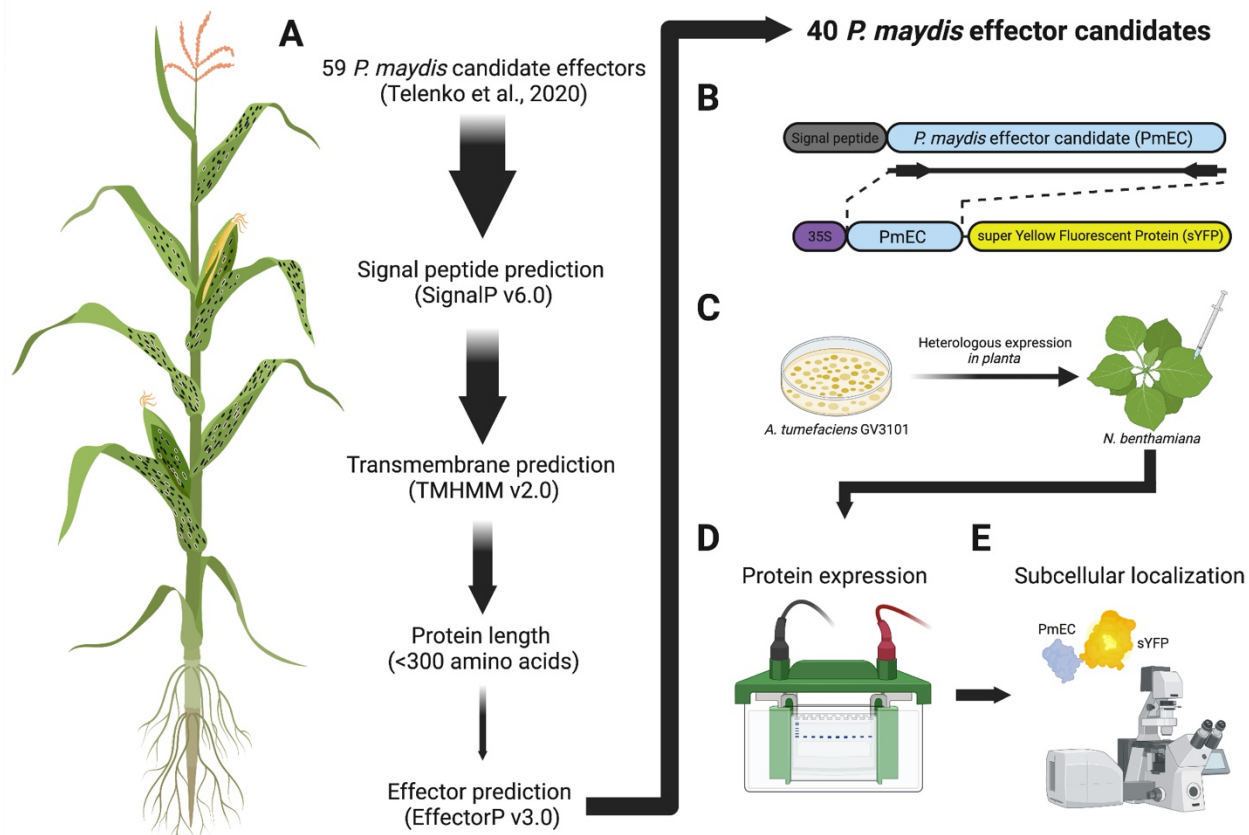

931

932

933

934

935

936

937

938

939

940

941

942 **Figure 2.**

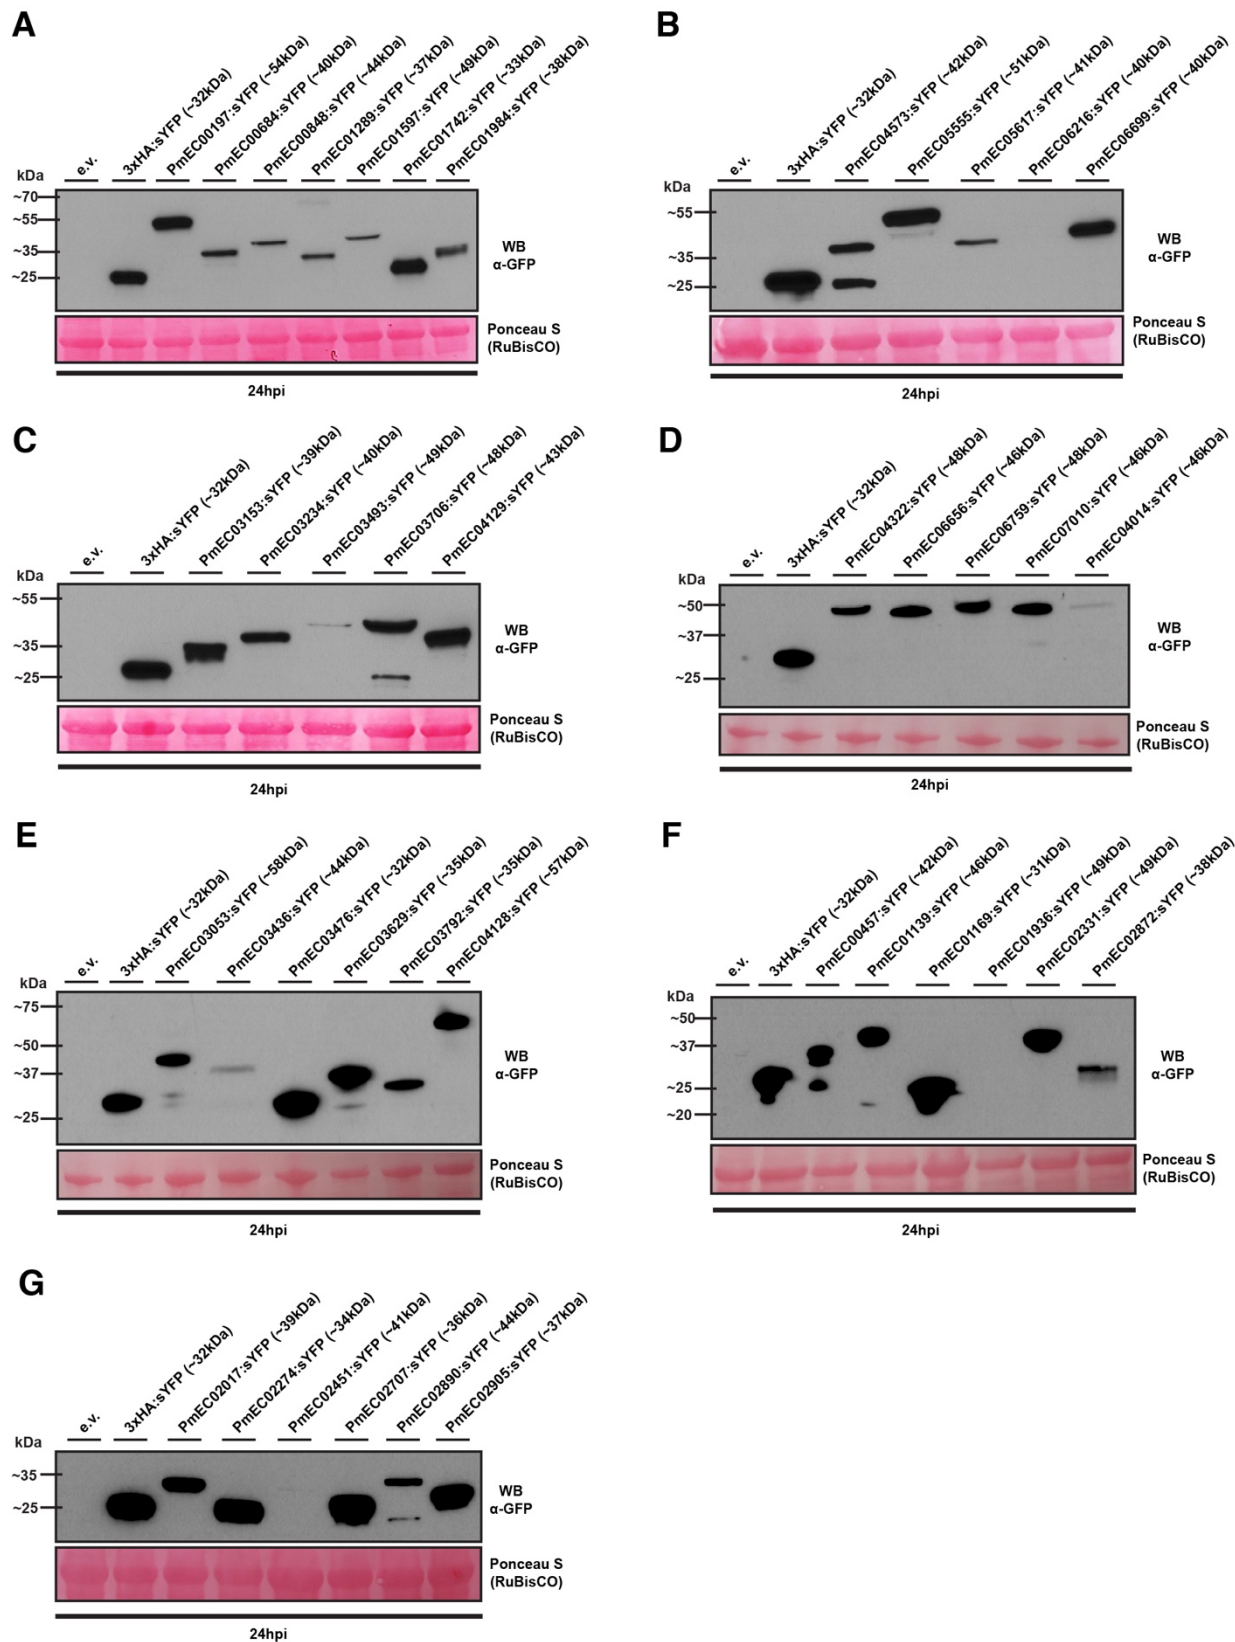

944 **Figure 3.**

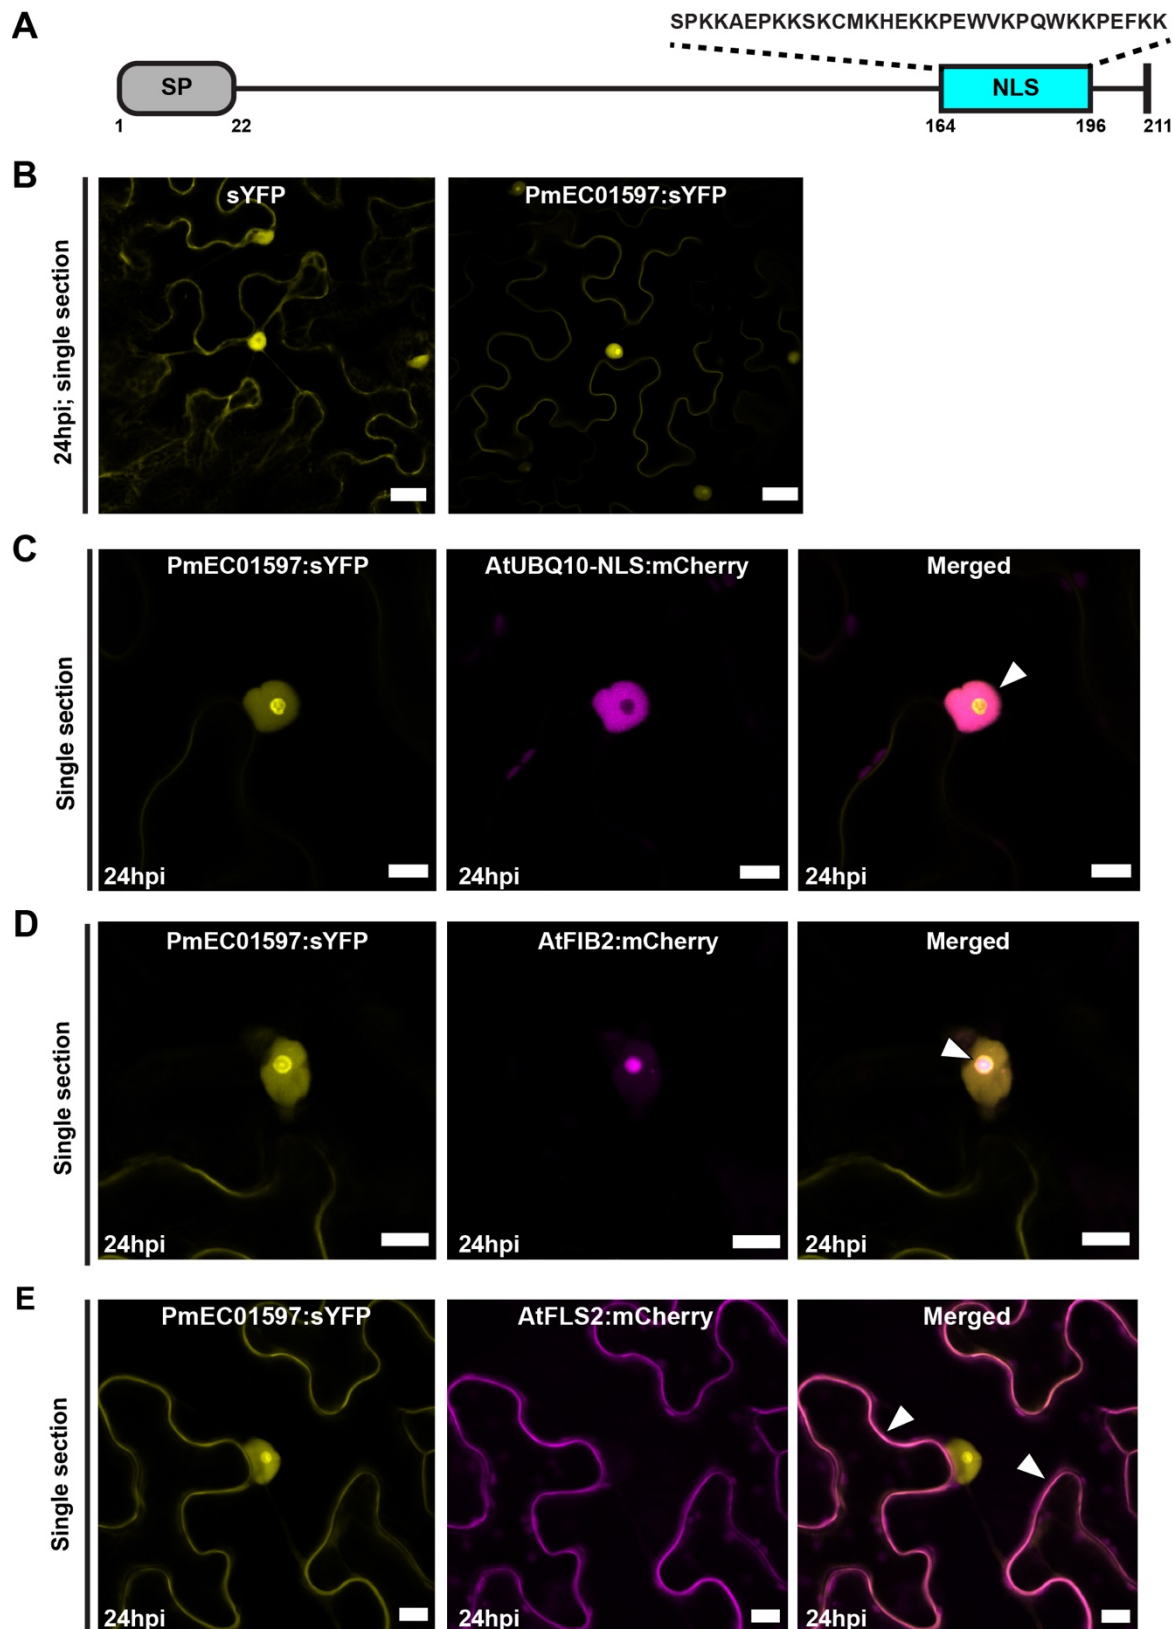

946 **Figure 4.**

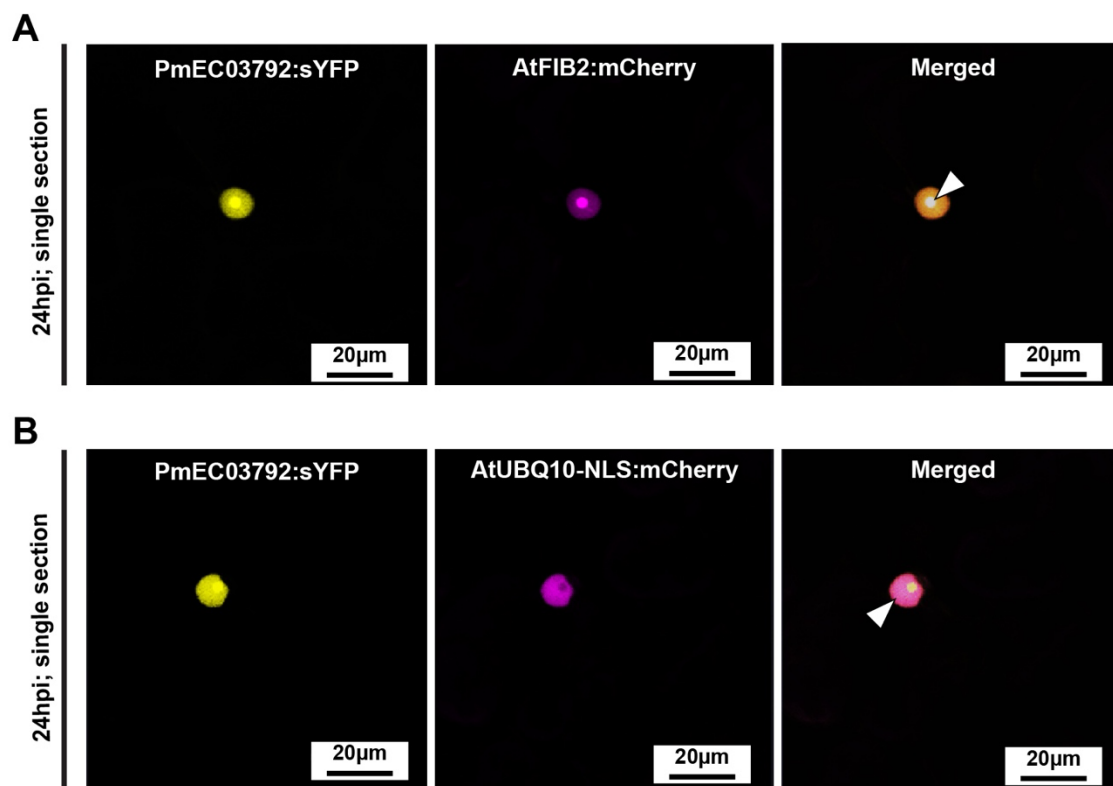

947

948

949

950

951

952

953

954

955

956

957

958

959

960 **Figure 5.**

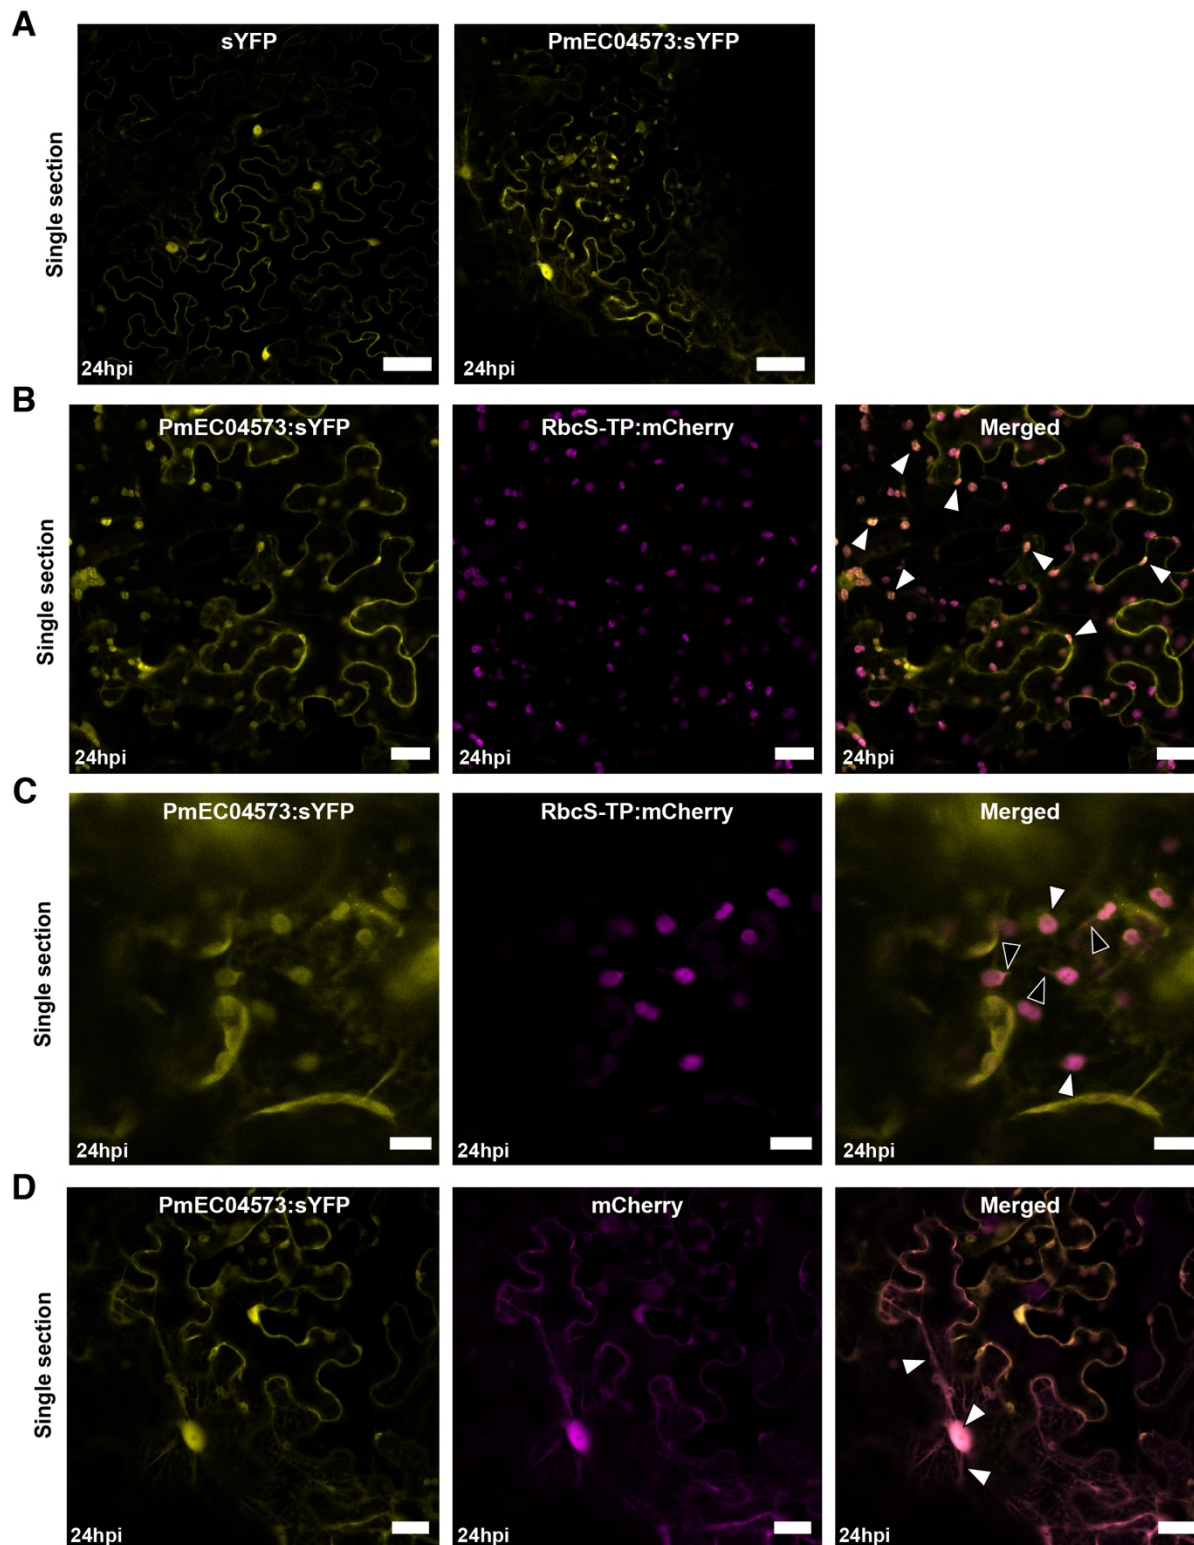

961

962

963 **Supplemental Figure 1.**

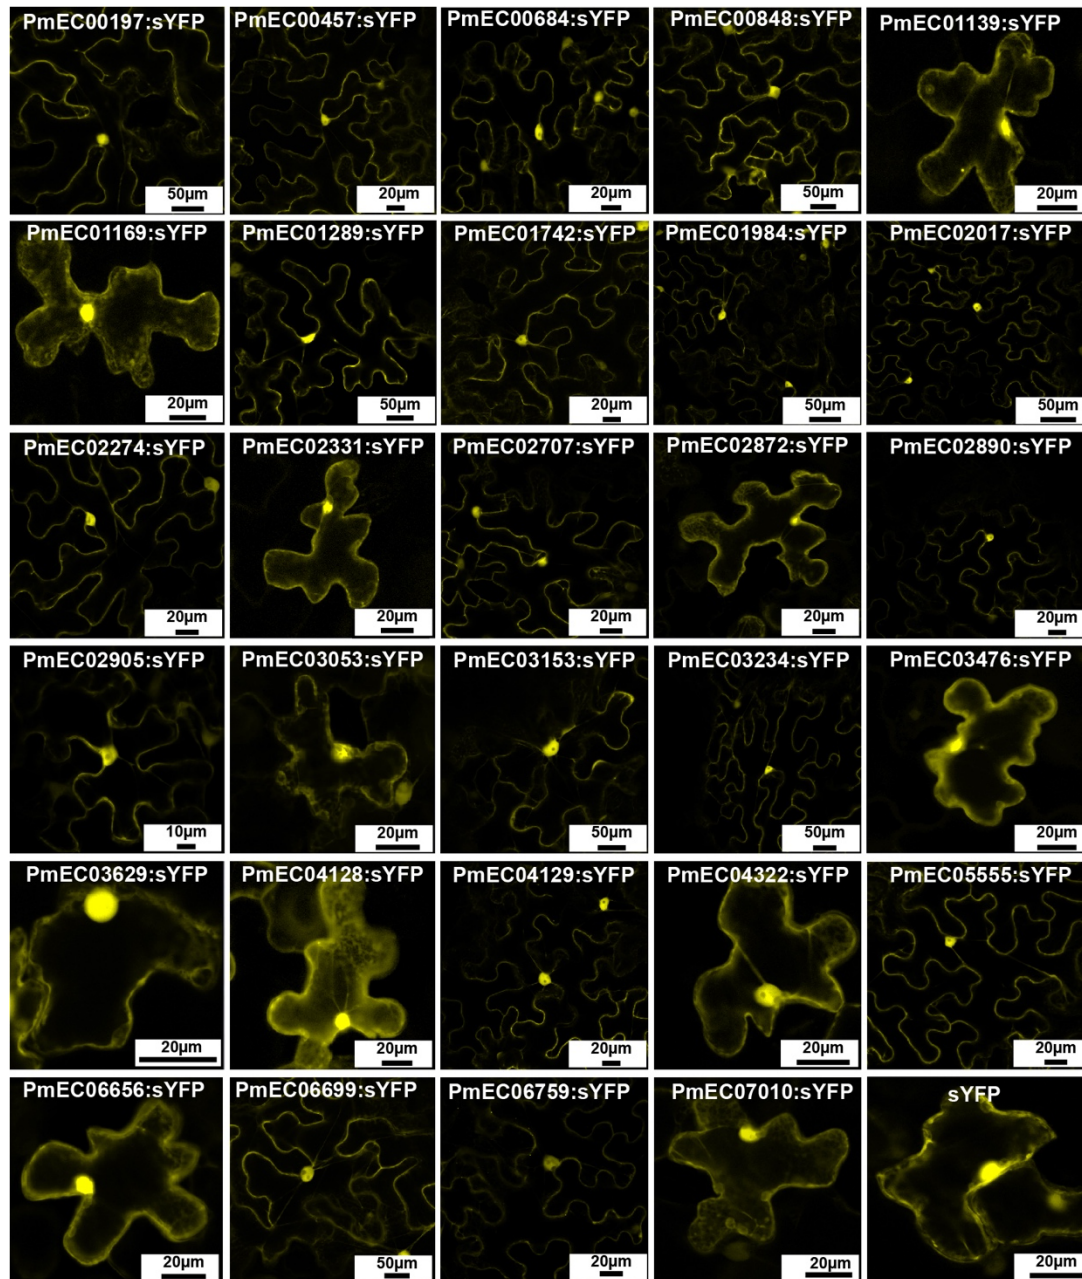

964

965

966

967

968

969

970 **Supplemental Figure 2.**

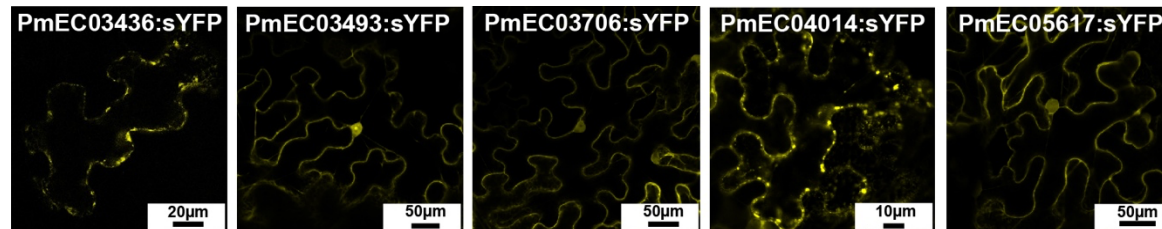



991 **Supplemental Figure 3.**

**A**

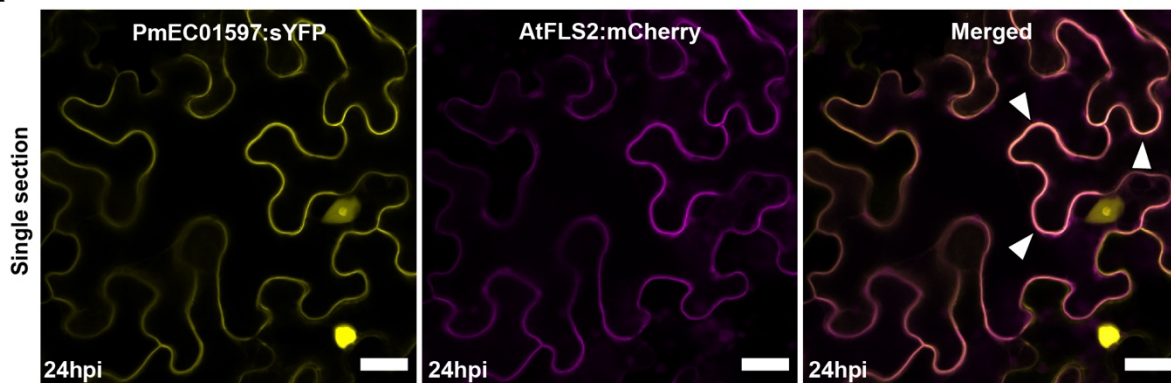

**B**

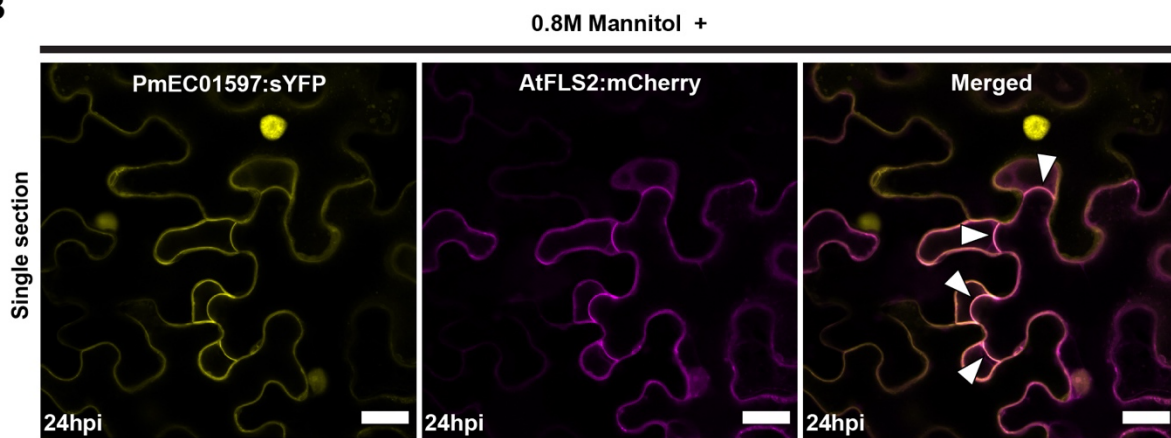

992

993

994

995

996

997

998

999

1000

1001

1002

1003 **Supplemental Figure 4.**

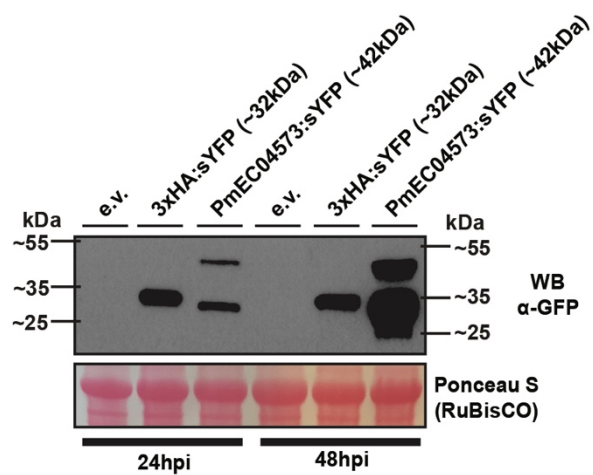

1004

1005

1006

1007

1008

1009

1010

1011

1012

1013

1014

1015

1016

1017

1018

1019

1020 **Supplemental Figure 5.**

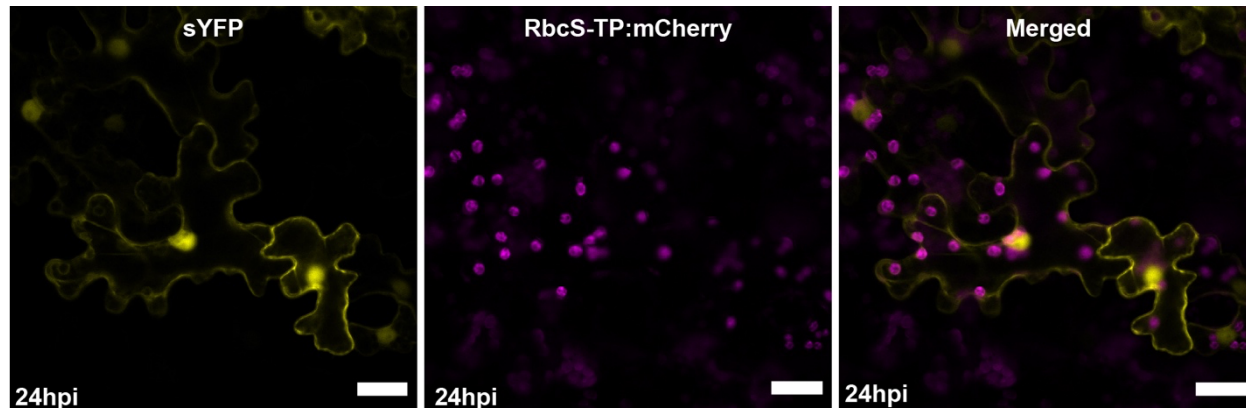

Source: https://www.biorxiv.org/content/10.1101/2022.05.24.492667v1.full.pdf
